# Supplementary material for: Coordination geometry-induced optical imaging of l-cysteine in cancer cells using imidazopyridine-based copper(ii) complexes
Source: Royal Society of Chemistry journal article supplement (doi:10.1039/c8dt04634d), 2018-12-22
Supplement: c8dt04634d1.pdf [file c8dt04634d1.pdf]

## Supporting information

### **Coordination Geometry Induced Optical Imaging of L-Cysteine in Cancer Cells using Imidazopyridine-Based Copper(II) Complexes**

**Selvarasu Priyanga,<sup>a</sup> Themmila Khamrang,<sup>b</sup> Marappan Velusamy,<sup>b</sup> Sellamuthu Karthi,<sup>c</sup> Balasubramaniam Ashokkumar,<sup>c</sup> and Ramasamy Mayilmurugan<sup>a\*</sup>**

<sup>a</sup>Bioinorganic Chemistry Laboratory/Physical Chemistry, School of Chemistry, Madurai Kamaraj University, Madurai, 625021. *Email:* [mayilmurugan.chem@mkuniversity.org](mailto:mayilmurugan.chem@mkuniversity.org).

<sup>b</sup>Department of Chemistry, North-Eastern Hill University, Shillong, 793022.

<sup>c</sup>School of Biotechnology, Madurai Kamaraj University, Madurai, 625 021.

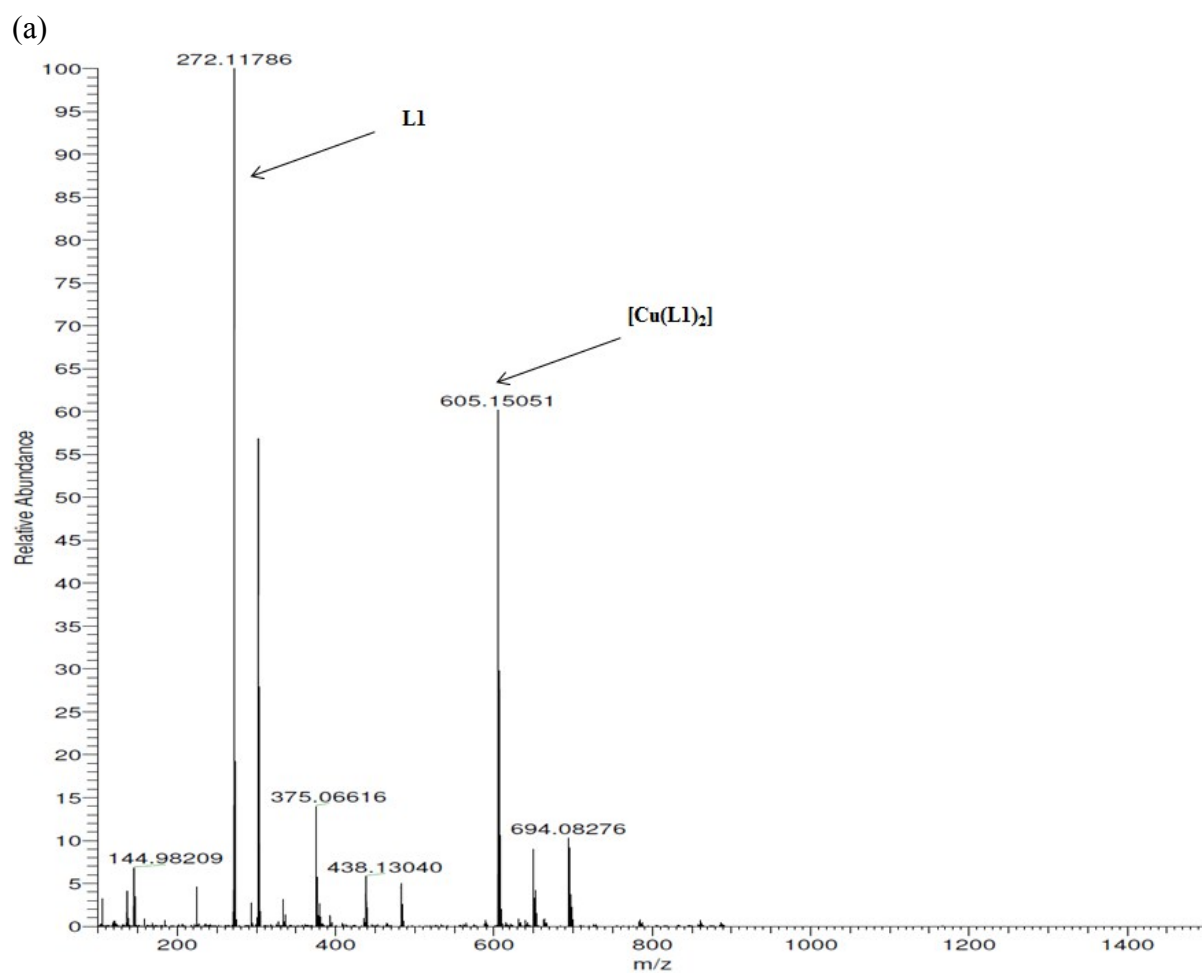

**Figure S1.** HR-ESI Mass spectra of **1** in CH<sub>3</sub>CN.

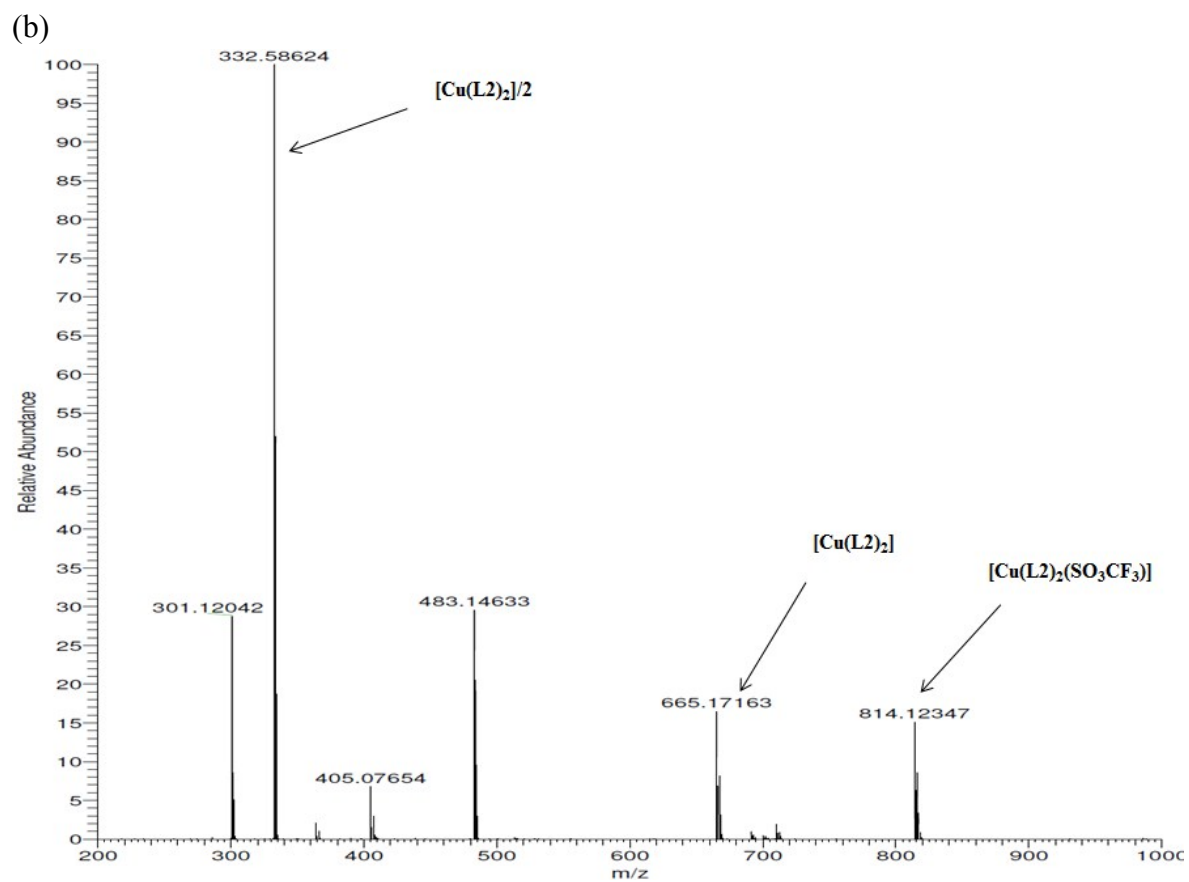

**Figure S2.** HR-ESI Mass spectra of **2** in  $\text{CH}_3\text{CN}$ .

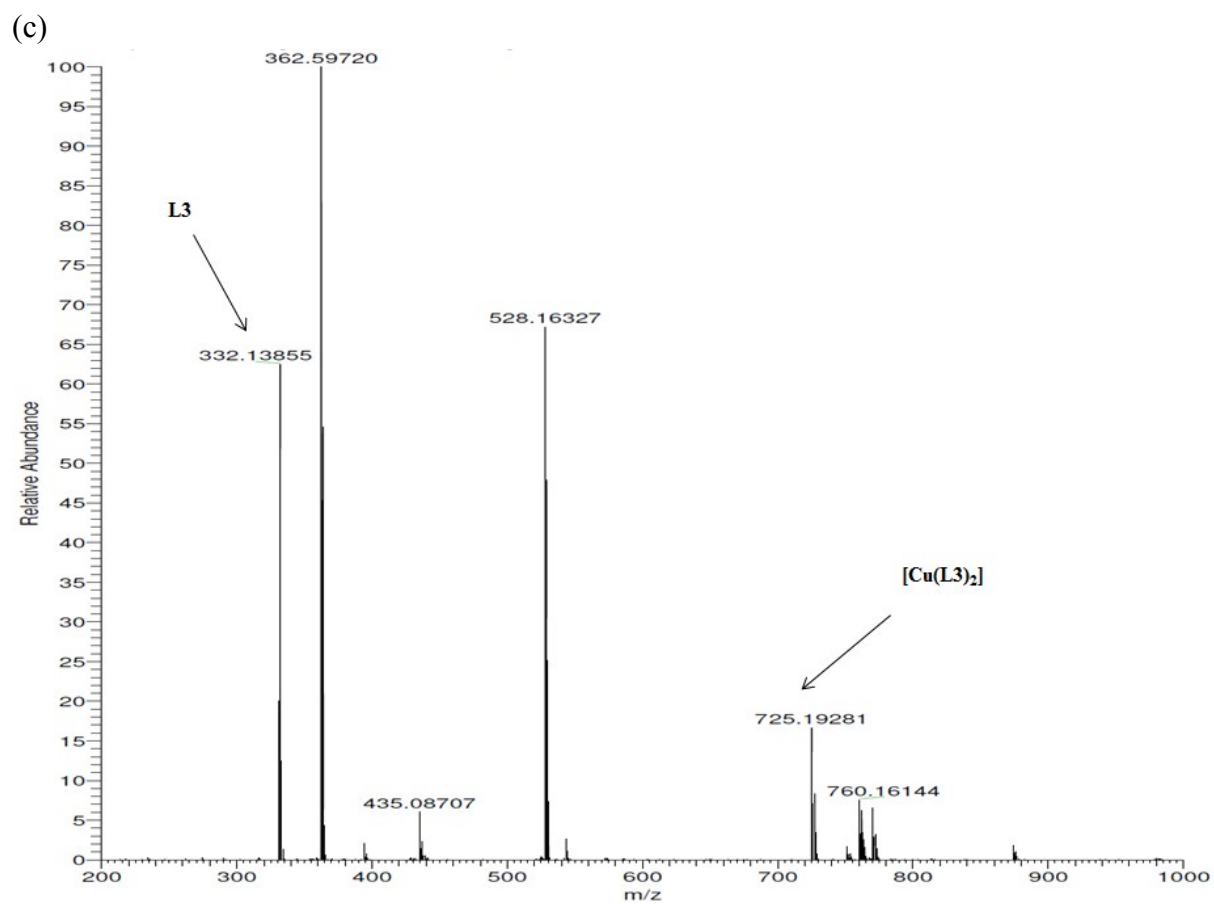

**Figure S3.** HR-ESI Mass spectra of **3** in CH<sub>3</sub>CN

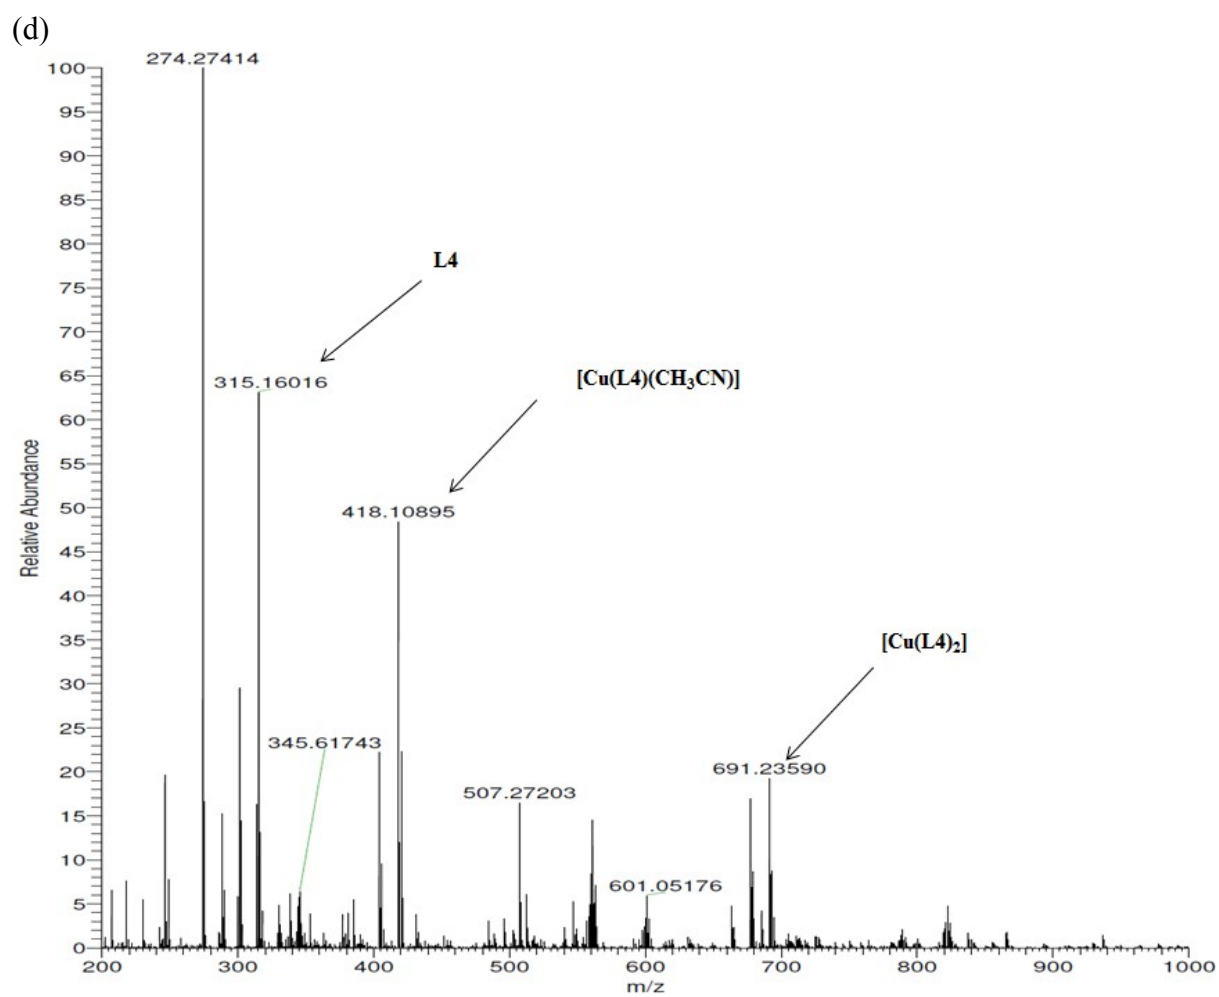

**Figure S4.** HR-ESI Mass spectra of **4** in CH<sub>3</sub>CN.

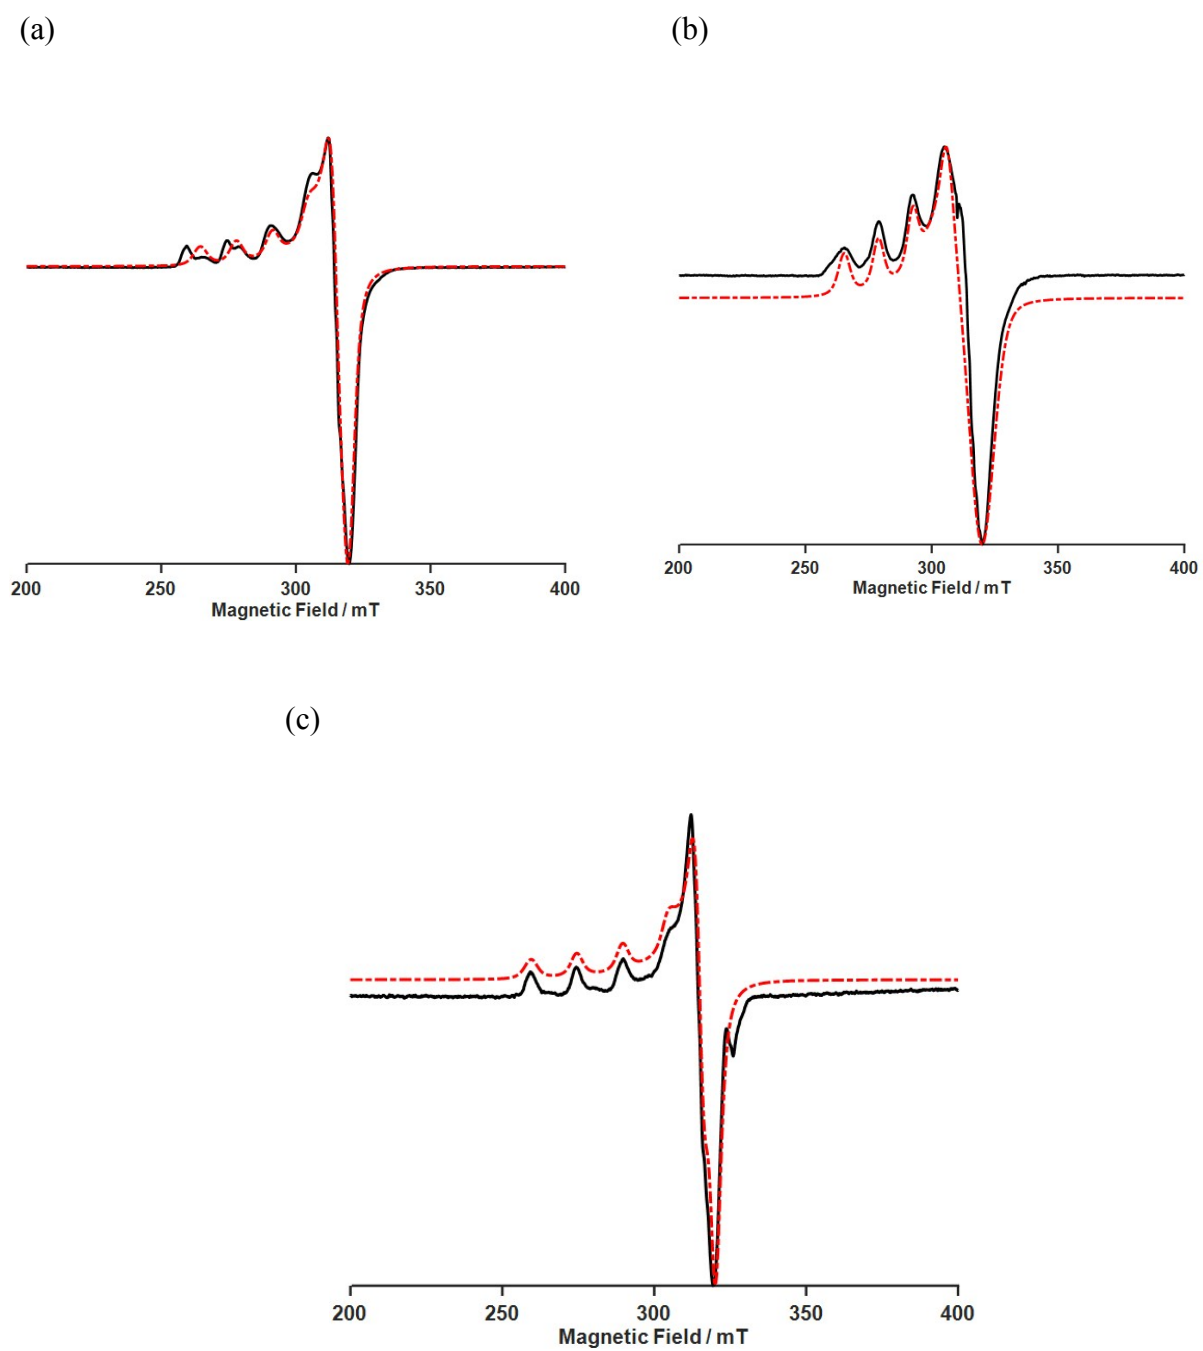

**Figure S5.** EPR spectra of **1** (a), **2** (b), **3** (c) in methanol/DMF. Experimental (black) and simulated spectra (red) are overlaid in each case.

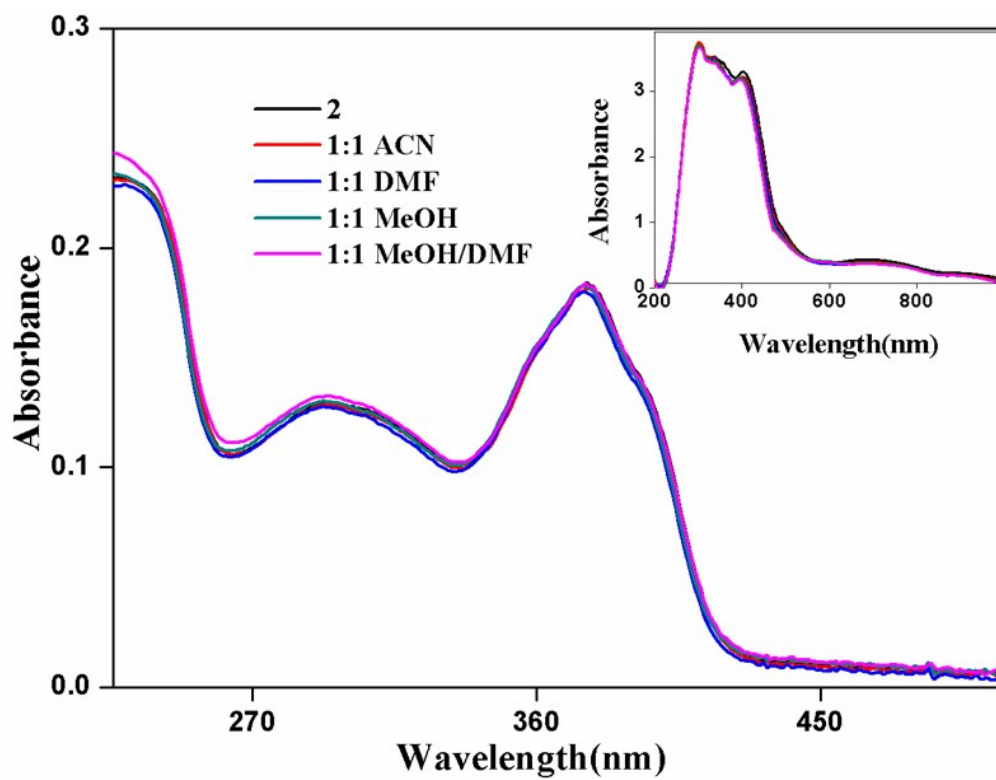

**Figure S6.** Absorption spectra of complex 2, 1:1 equivalence of ligand and complex 2 in acetonitrile, methanol, DMF or in methanol-DMF mixture. Inset: d-d band changes.

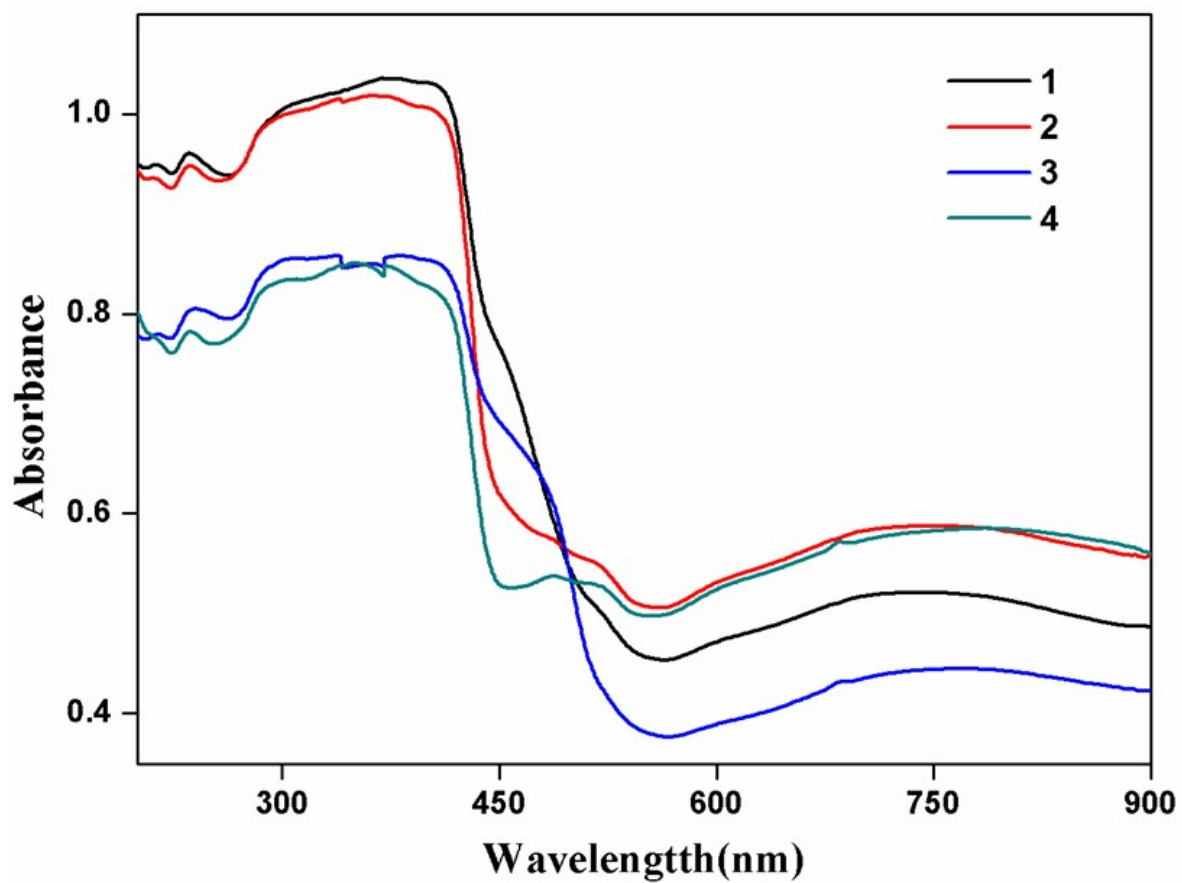

Figure S7. Solid state absorbance spectra for 1 - 4.



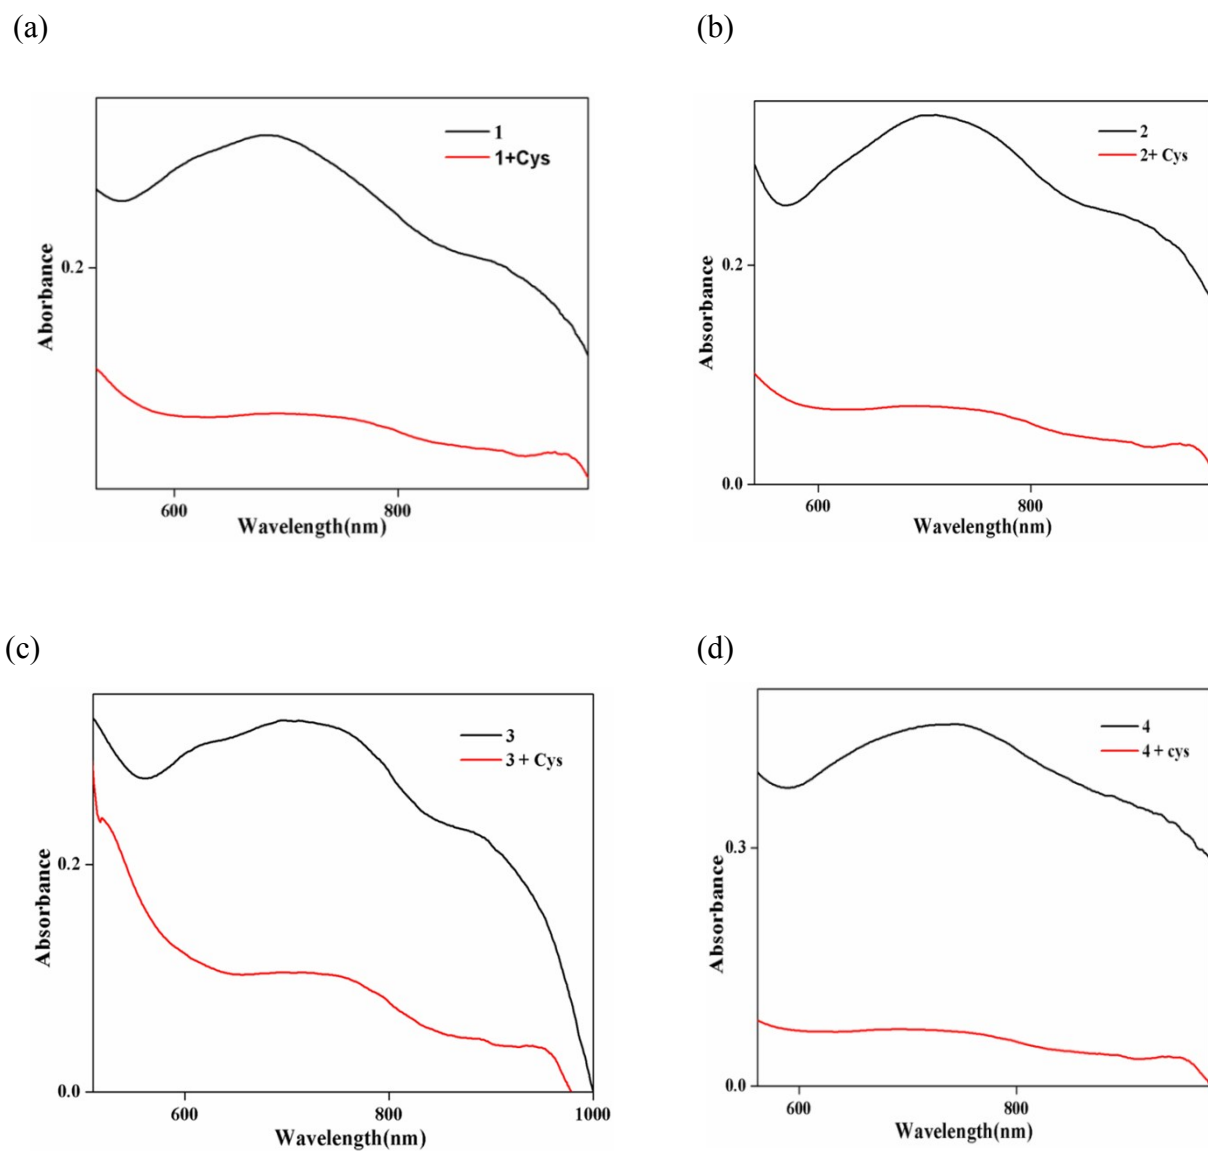

**Figure S8.** The changes in the d-d band of **1** (a), **2** (b), **3** (c) and **4** (d) with Cys in the concentration of  $1 \times 10^{-2}$  M (acetonitrile/HEPES buffer solution, pH 7.34) at 25°C.

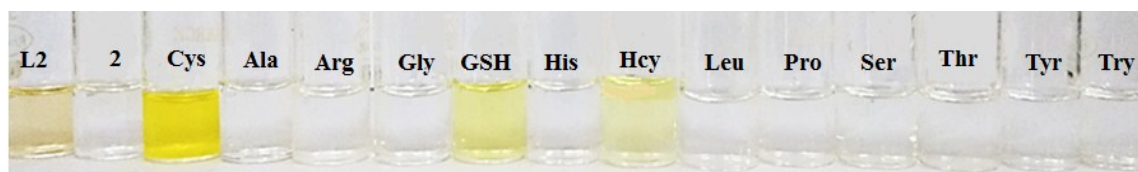

**Figure S9.** Color changes observed for **2** (40 $\mu$ M) upon the addition of 10 equivalents of various amino acid in HEPES buffer solution (pH 7.34) at 25 $^{\circ}$ C.

a)

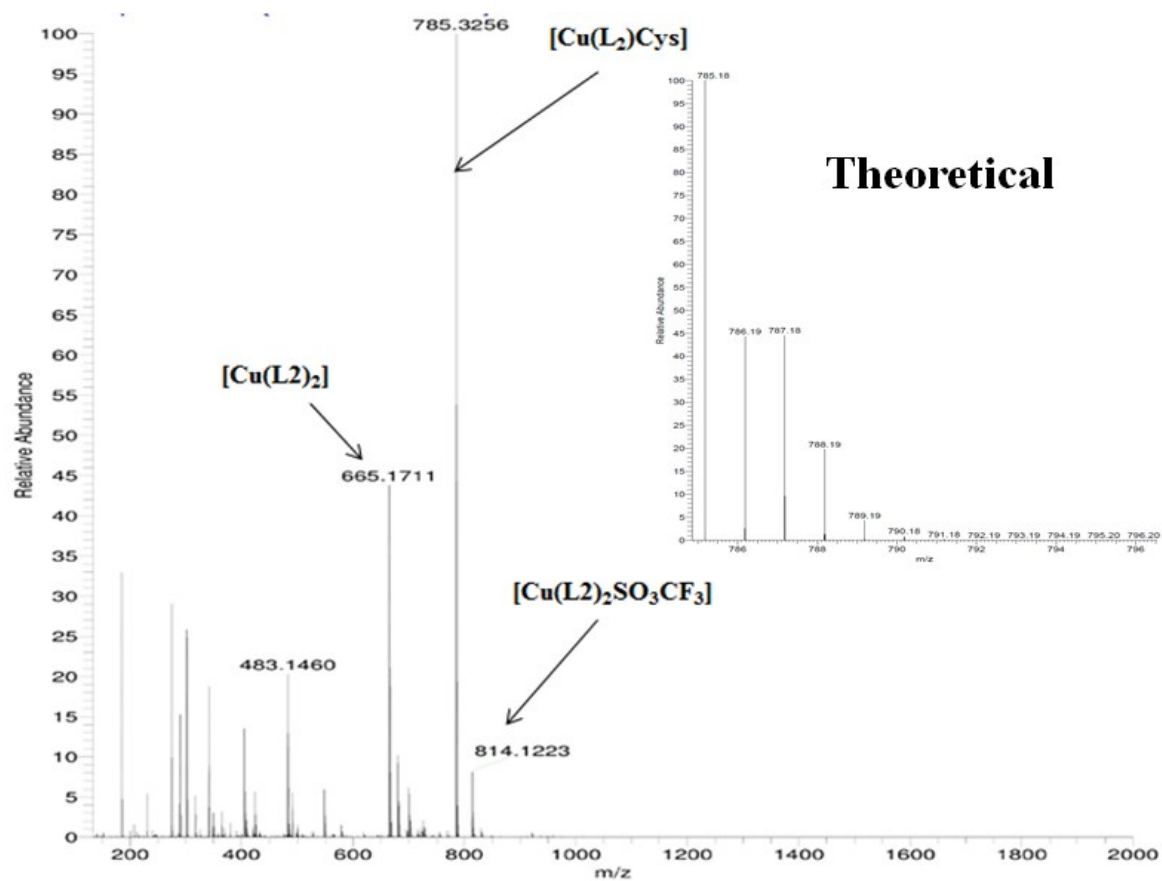

**Figure S10.** HR-ESI Mass spectra of **2** + Cys in CH<sub>3</sub>CN, Inset: Theoretical.

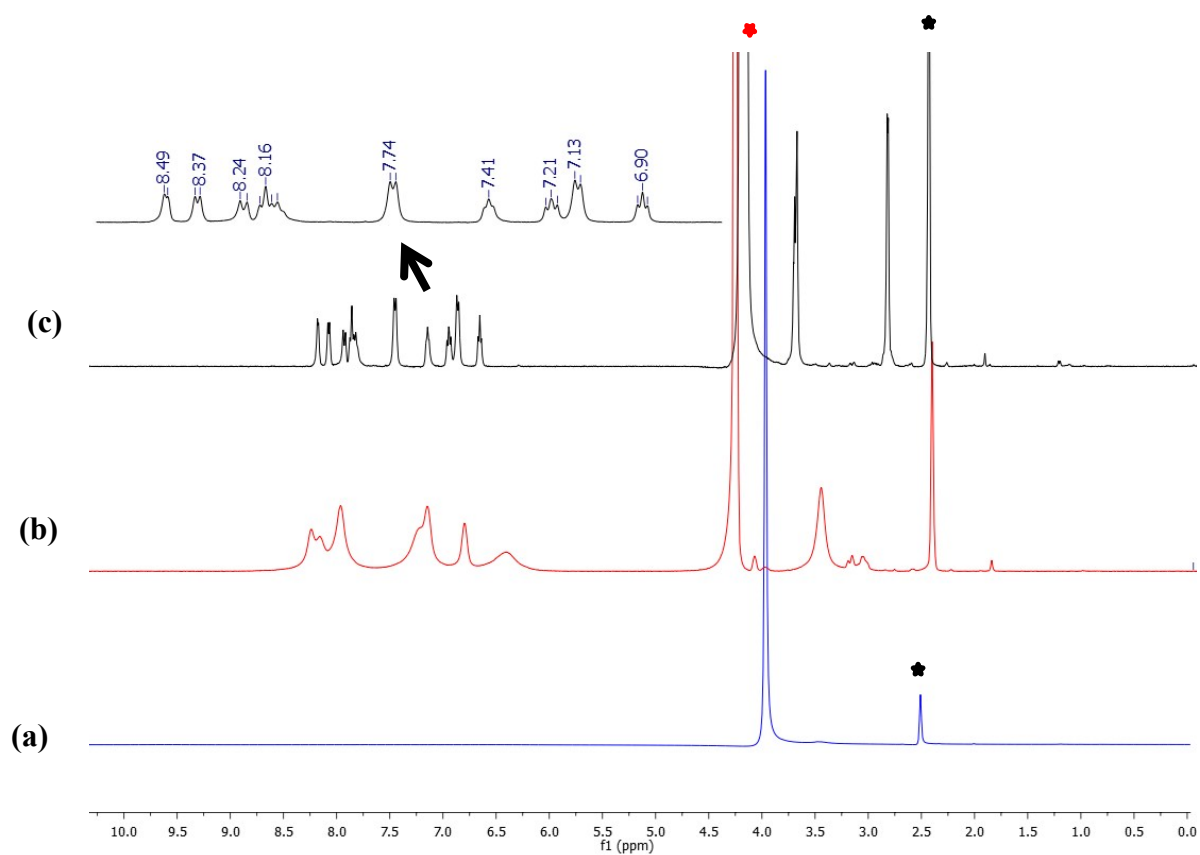

**Figure S11.** The  $^1\text{H}$ NMR spectra of **2** (a), **2** + Cys (1 equivalent) (b), **2** + 5equivalents of Cys (c). Peaks corresponds to  $\star$   $\text{D}_2\text{O}$  and  $\blackstar$  DMSO.

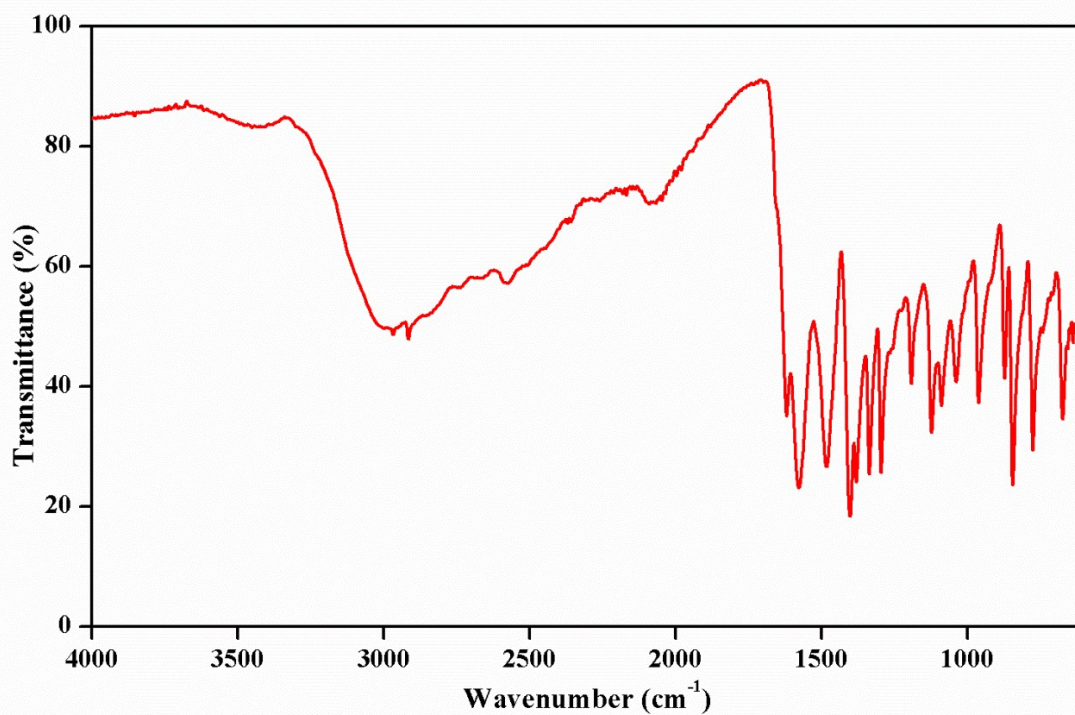

**Figure S12.** FT-IR spectra for [Cu(L2)<sub>2</sub>(Cys)] adduct.

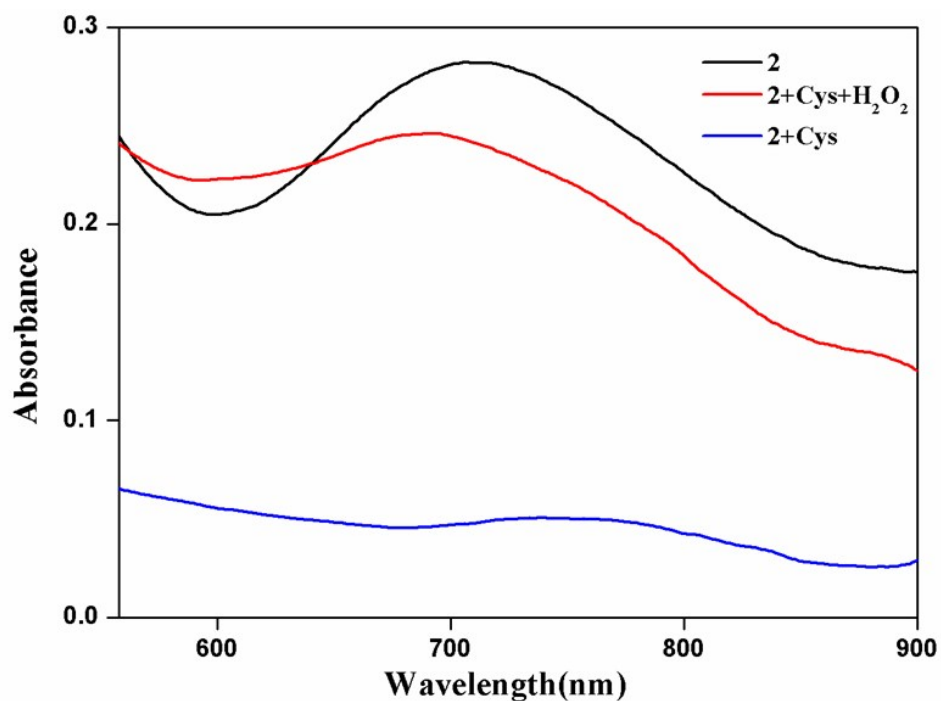

**Figure S13.** The changes in the d-d band of **2**, **2** + Cys and Cys adduct of **2** + H<sub>2</sub>O<sub>2</sub> ( $1 \times 10^{-2}$  M) in DMF/HEPES buffer solution, pH 7.34 at 25°C.

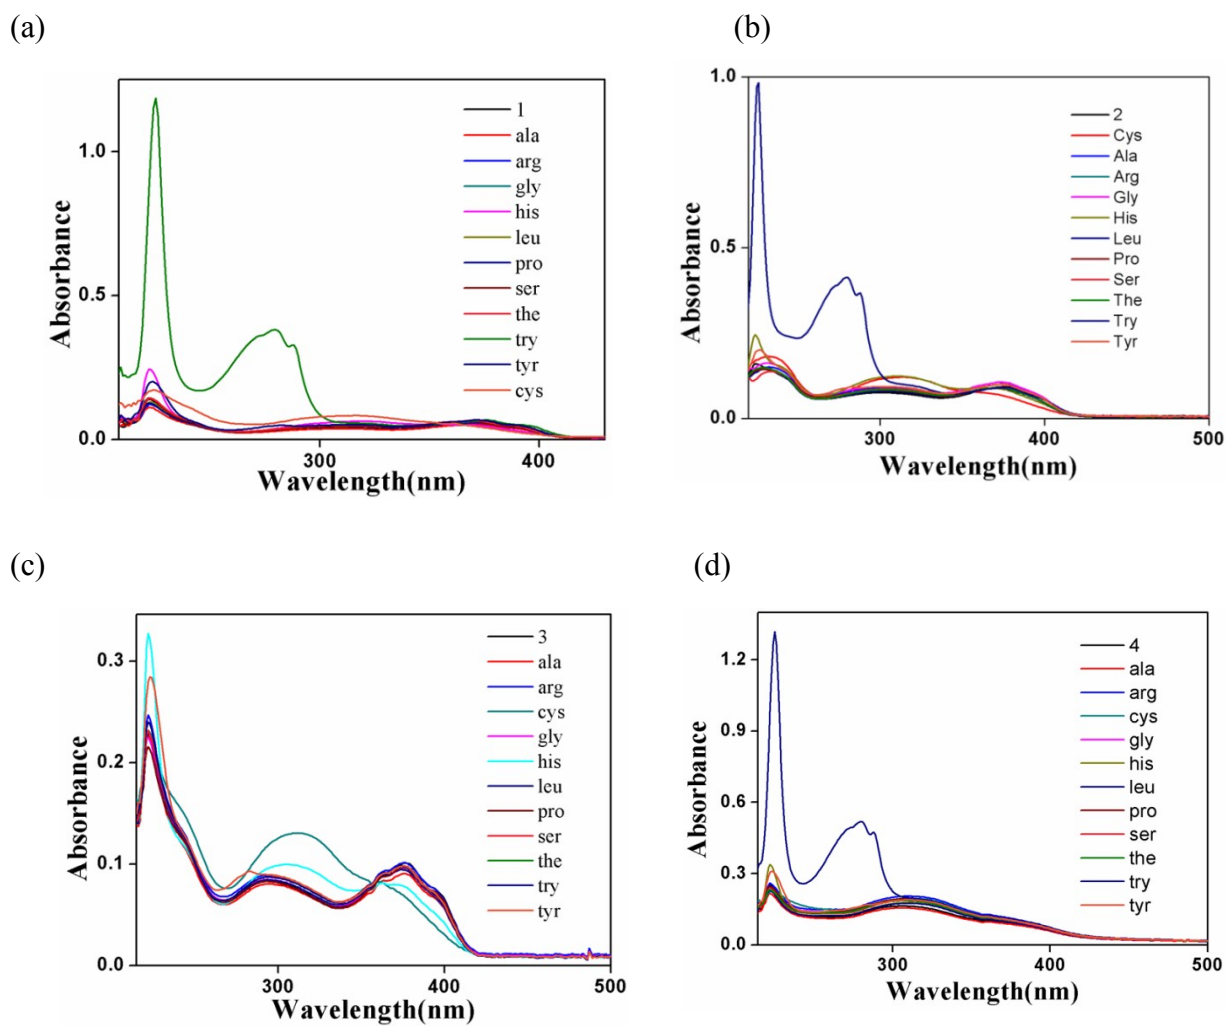

**Figure S14.** UV-Vis spectral changes for **1** (a), **2** (b) **3** (c) and **4** (d) ( $5 \times 10^{-6}$  M) with selected amino acids in HEPES buffer (pH 7.34) at 25°C.

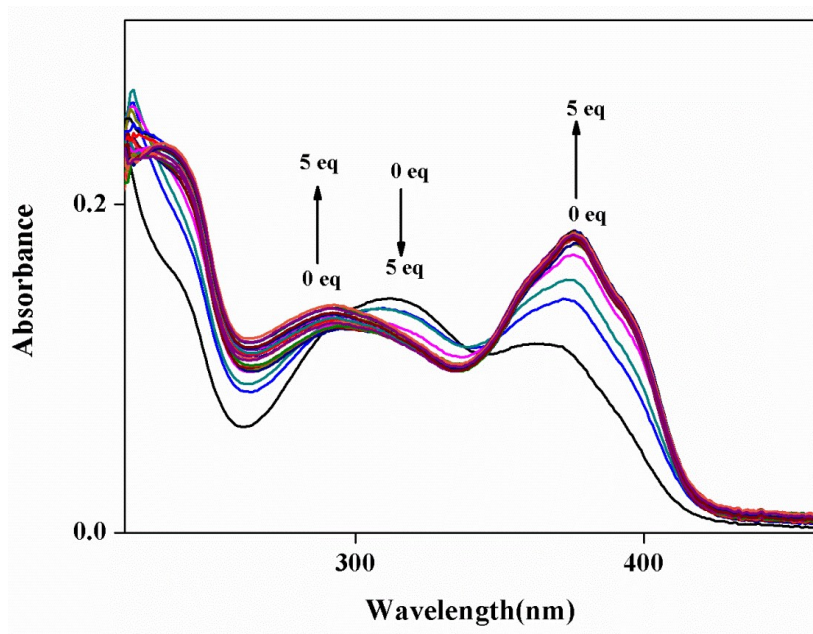

**Figure S15.** UV-Vis spectral changes for the addition of  $\text{Cu}(\text{SO}_3\text{CF}_3)_2$  to L2 ( $5 \times 10^{-6}$  M) in HEPES buffer (pH 7.34) at 25°C.

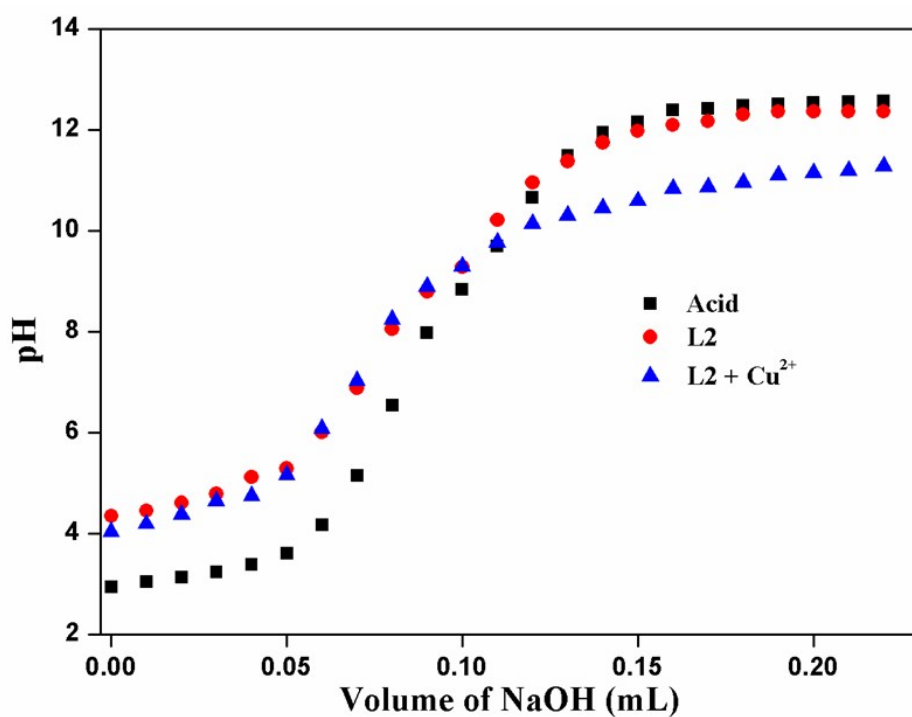

**Figure S16.** The plot of pH against 0.1 M of NaOH at 30°C acid (nitric acid), L2, L2 +  $\text{Cu}(\text{SO}_3\text{CF}_3)$  in dioxane water mixture.

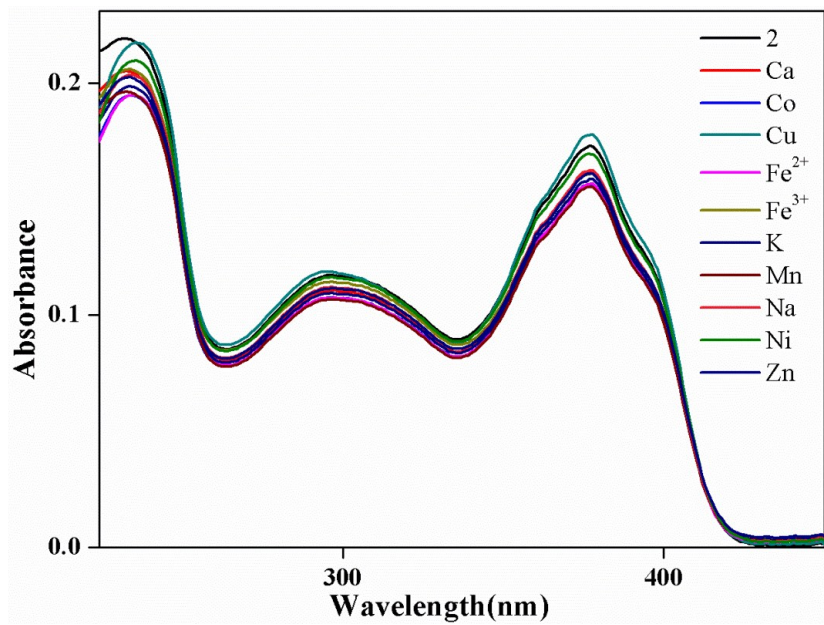

**Figure S17.** UV-Vis spectral changes of **2** with biologically relevant cations at 25°C in HEPES buffer pH 7.3

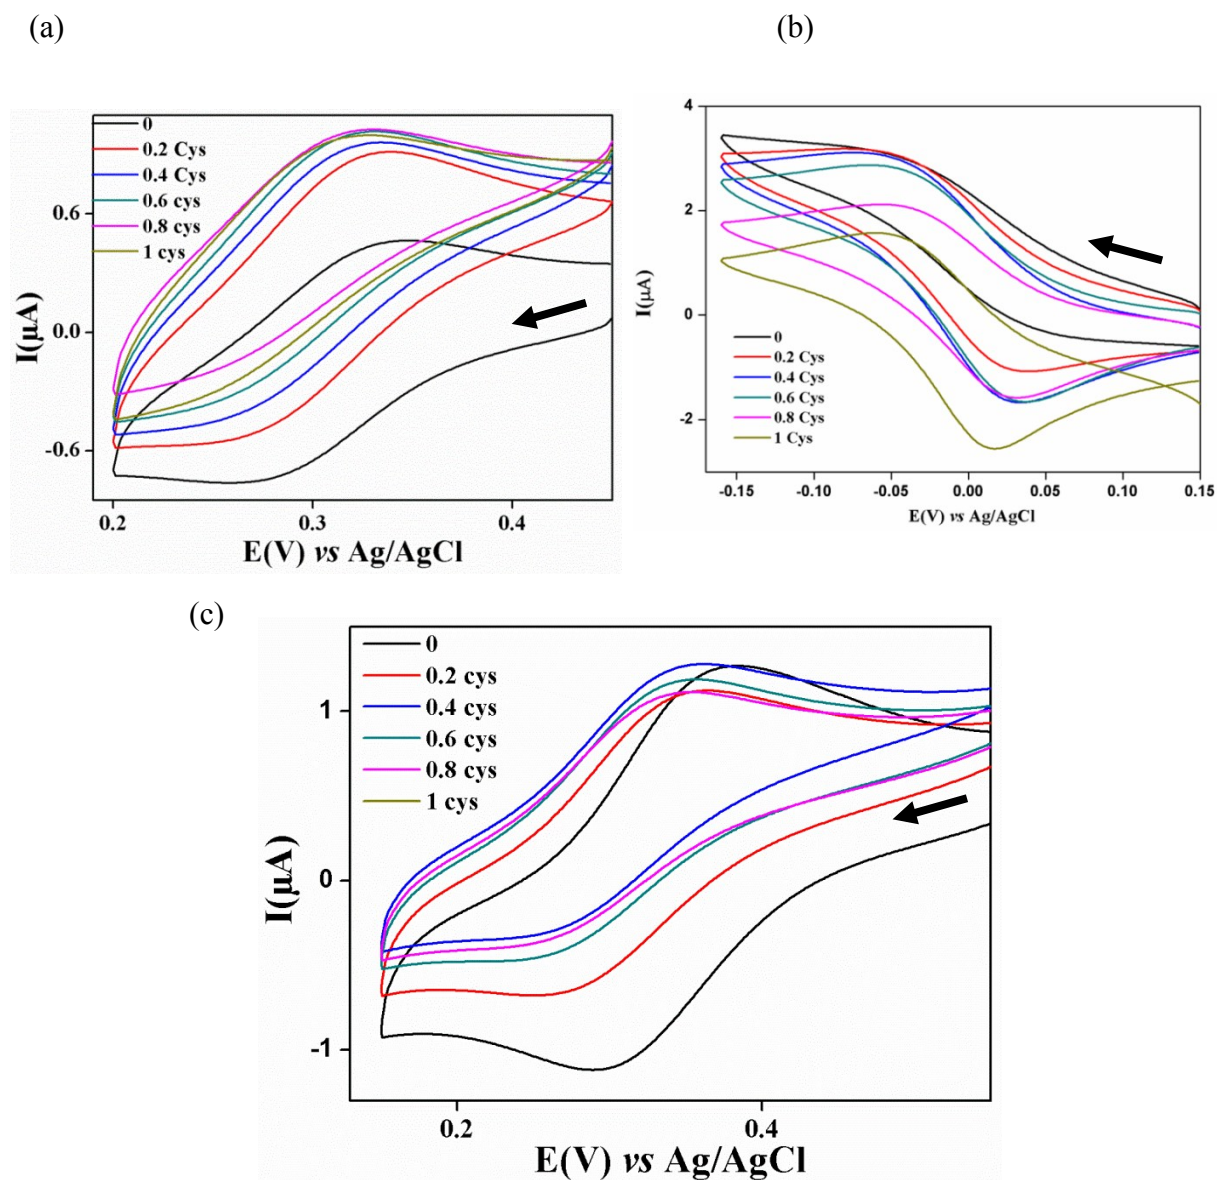

**Figure S18.** Electrochemical titration of complexes **1** (a), **3** (b) and **4** (c) ( $1 \times 10^{-3}$ ) with varying amount of Cys (0 to 1 equivalent.). [Reference: saturated Ag/Ag<sup>+</sup>; counter electrode: Pt and supporting electrolyte: 0.1M NaCl solution; scan rate: = 50 mV s<sup>-1</sup>].



(a)

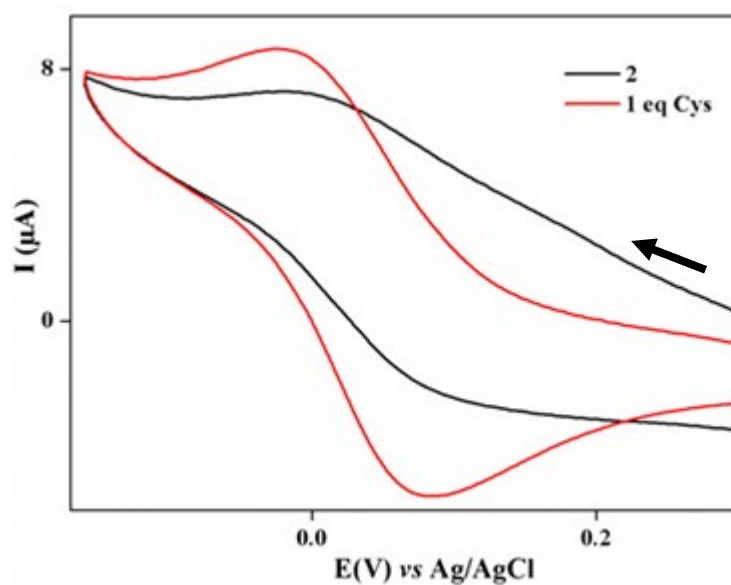

(b)

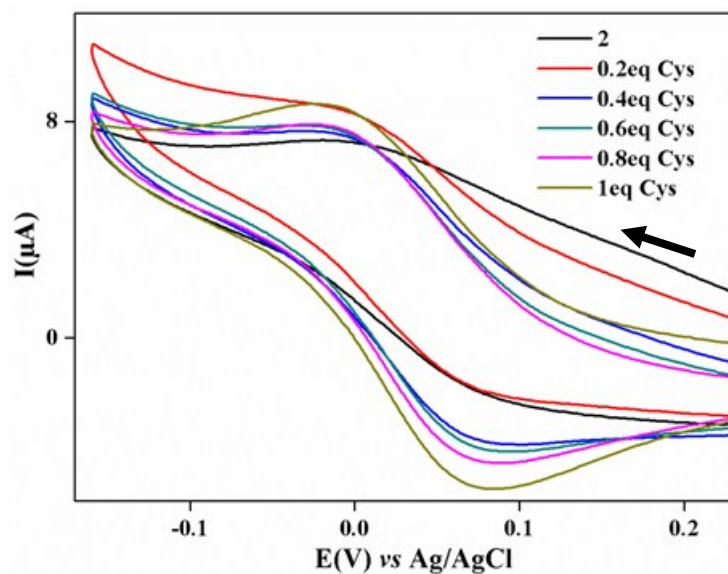

**Figure S19.** Cyclic voltammograms (CV) of complex  $[\text{Cu}(\text{L}2)_2(\text{SO}_3\text{CF}_3)](\text{SO}_3\text{CF}_3)$  **2** ( $1 \times 10^{-3}$ ) with one equivalent of Cys (a). Complex **2** with different Cys concentrations from 0 to 1 equivalent (b). [Reference: saturated Ag/Ag<sup>+</sup>; counter electrode: Pt and supporting electrolyte: 0.1M NaCl solution; scan rate: =  $50 \text{ mV s}^{-1}$ ].

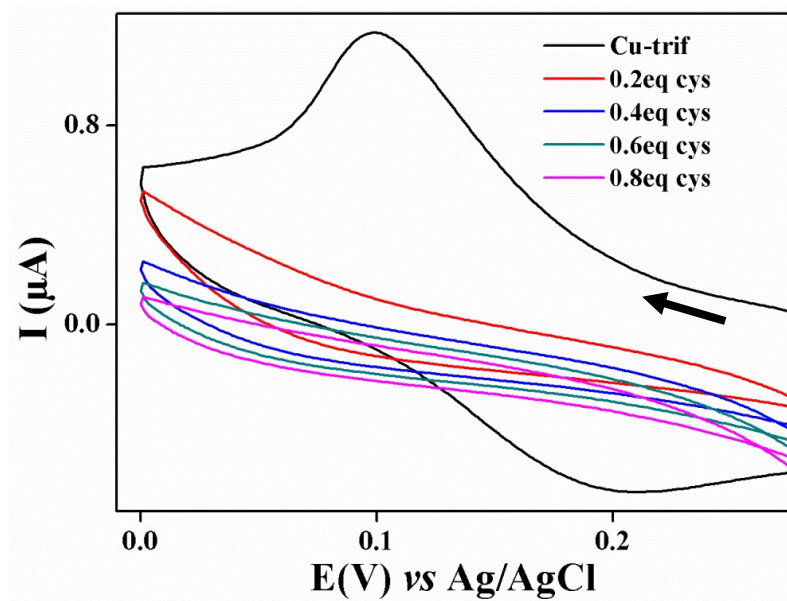

**Figure S20.** Electrochemical titration of Cys with  $\text{Cu}^{2+}$  ion solution in HEPES buffer pH = 7.34 at 25°C (concentration  $1 \times 10^{-3}$  M) [reference: saturated Ag/Ag<sup>+</sup>; counter electrode: Pt and supporting electrolyte: 0.1M NaCl solution; scan rate =  $50 \text{ mVs}^{-1}$ ].

a)

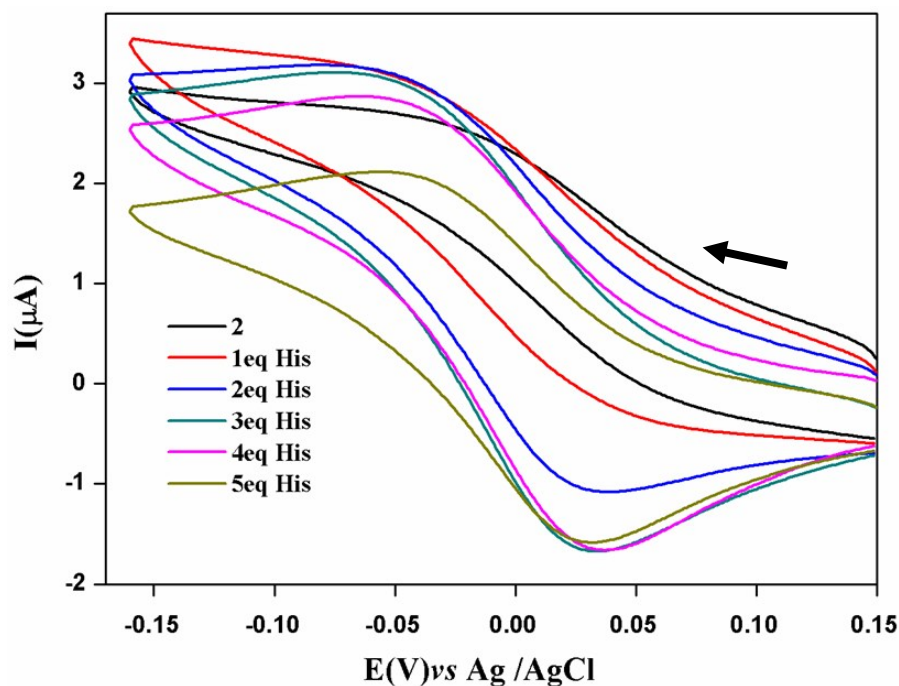

b)

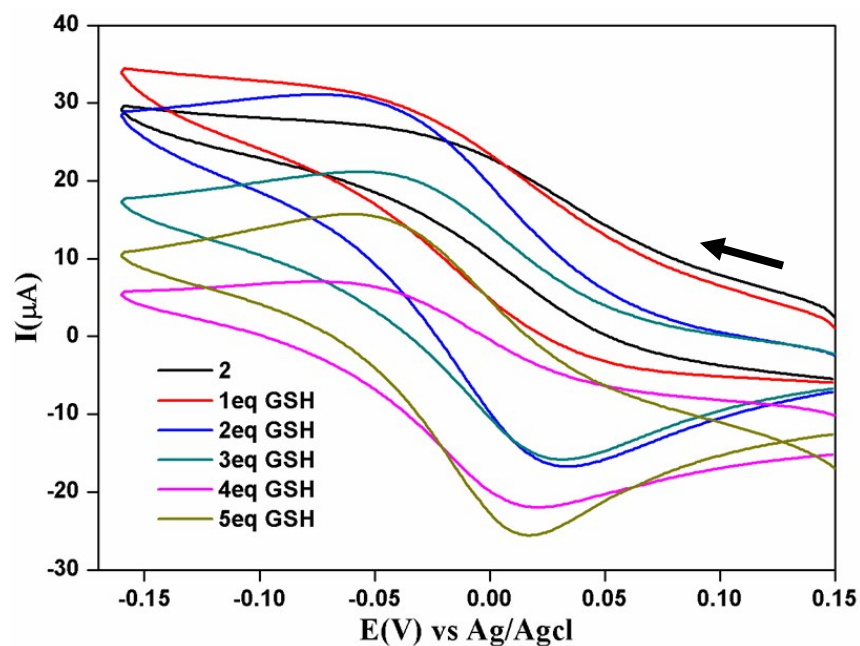

**Figure S21.** Cyclic voltammograms (CV) of complex  $[\text{Cu}(\text{L}2)_2(\text{SO}_3\text{CF}_3)](\text{SO}_3\text{CF}_3)$  **2** (a) ( $1 \times 10^{-3}$ ) with 1 to 5 equivalents of His. (b) Complex **2** with different GSH concentrations from 1 to 5 equivalents. [Reference: saturated Ag/Ag<sup>+</sup>; counter electrode: Pt and supporting electrolyte: 0.1M NaCl solution; scan rate: =  $50 \text{ mV s}^{-1}$ ].

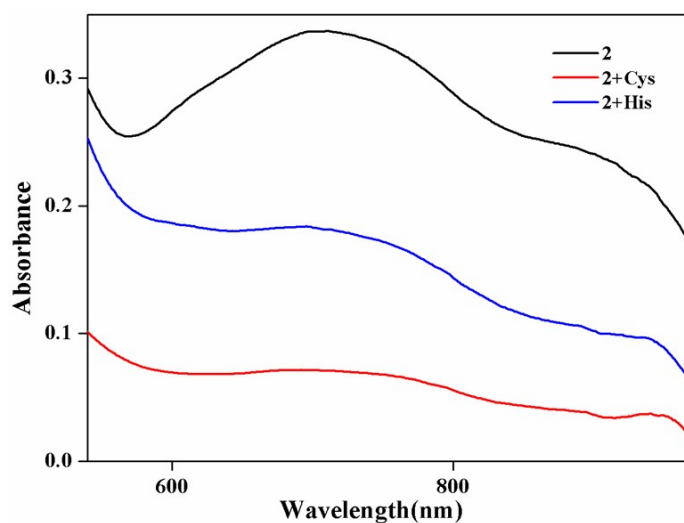

**Figure S22.** The changes in the d-d band of **2**, **2** + Cys, **2** + His ( $1 \times 10^{-2}$  M) in acetonitrile/HEPES buffer solution, pH 7.34 at  $25^\circ\text{C}$ .

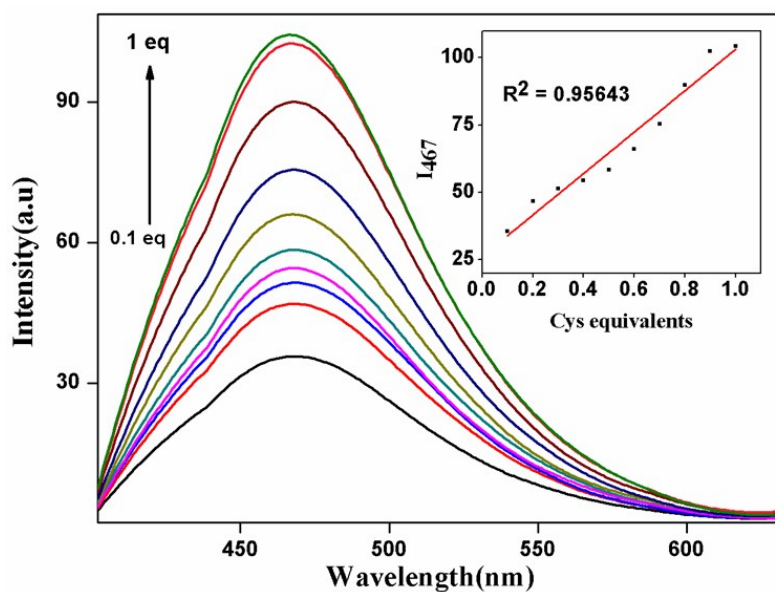

**Figure S23.** Changes in fluorescence intensity of **2** by addition of various concentrations of His ( $5 \times 10^{-7}$  M to  $5 \times 10^{-6}$  M) in HEPES buffer pH, 7.34 at  $25^\circ\text{C}$ , [ $\lambda_{\text{ex}} = 367$  nm, slits: 5nm/5nm]. Inset: Plot of fluorescence intensity vs [His].

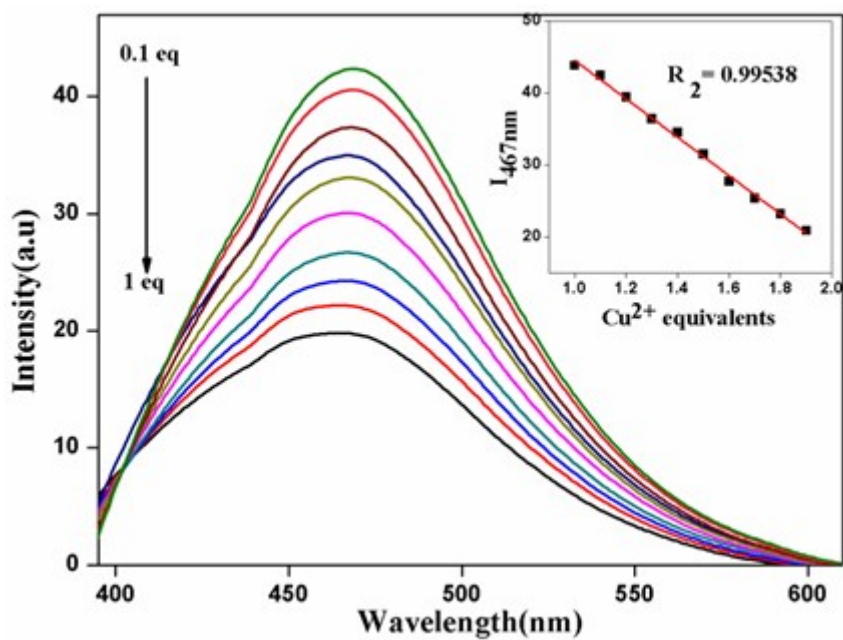

**Figure S24.** The changes in fluorescence intensity of L2 by addition of various concentrations of Cu<sup>2+</sup> ( $5 \times 10^{-7}$  M to  $5 \times 10^{-6}$  M) in HEPES buffer pH, 7.34 at 25°C, [ $\lambda_{\text{ex}} = 367$  nm, slits: 5nm/5nm]. Inset: Plot of fluorescence intensity vs [Cys].

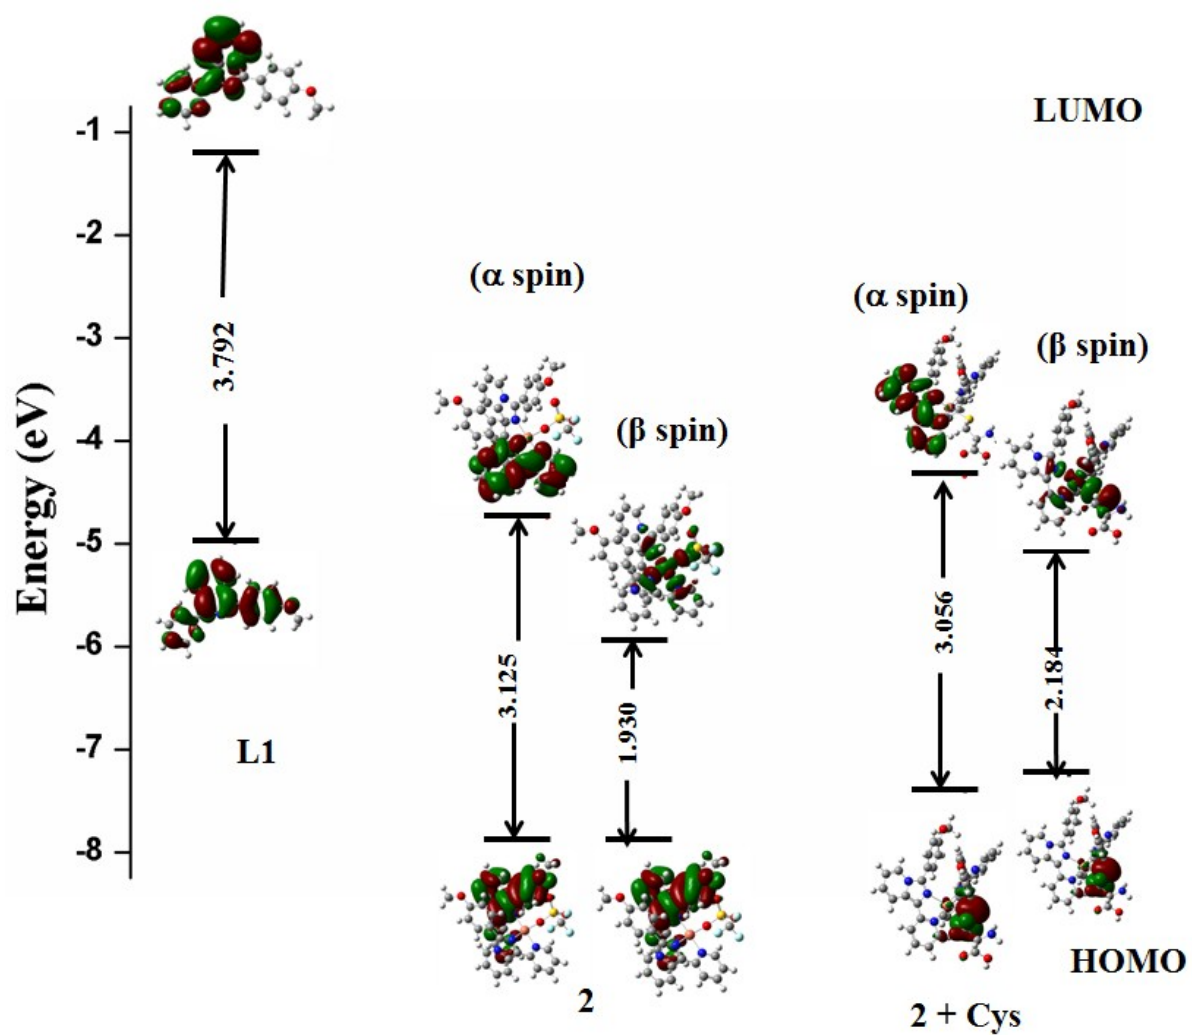

**Figure S25.** Energy profile diagram for L2, **2** and **2 + Cys**; HOMO and LUMO are calculated by TD-DFT using B3LYP 6-31G/LANL2DZ level.

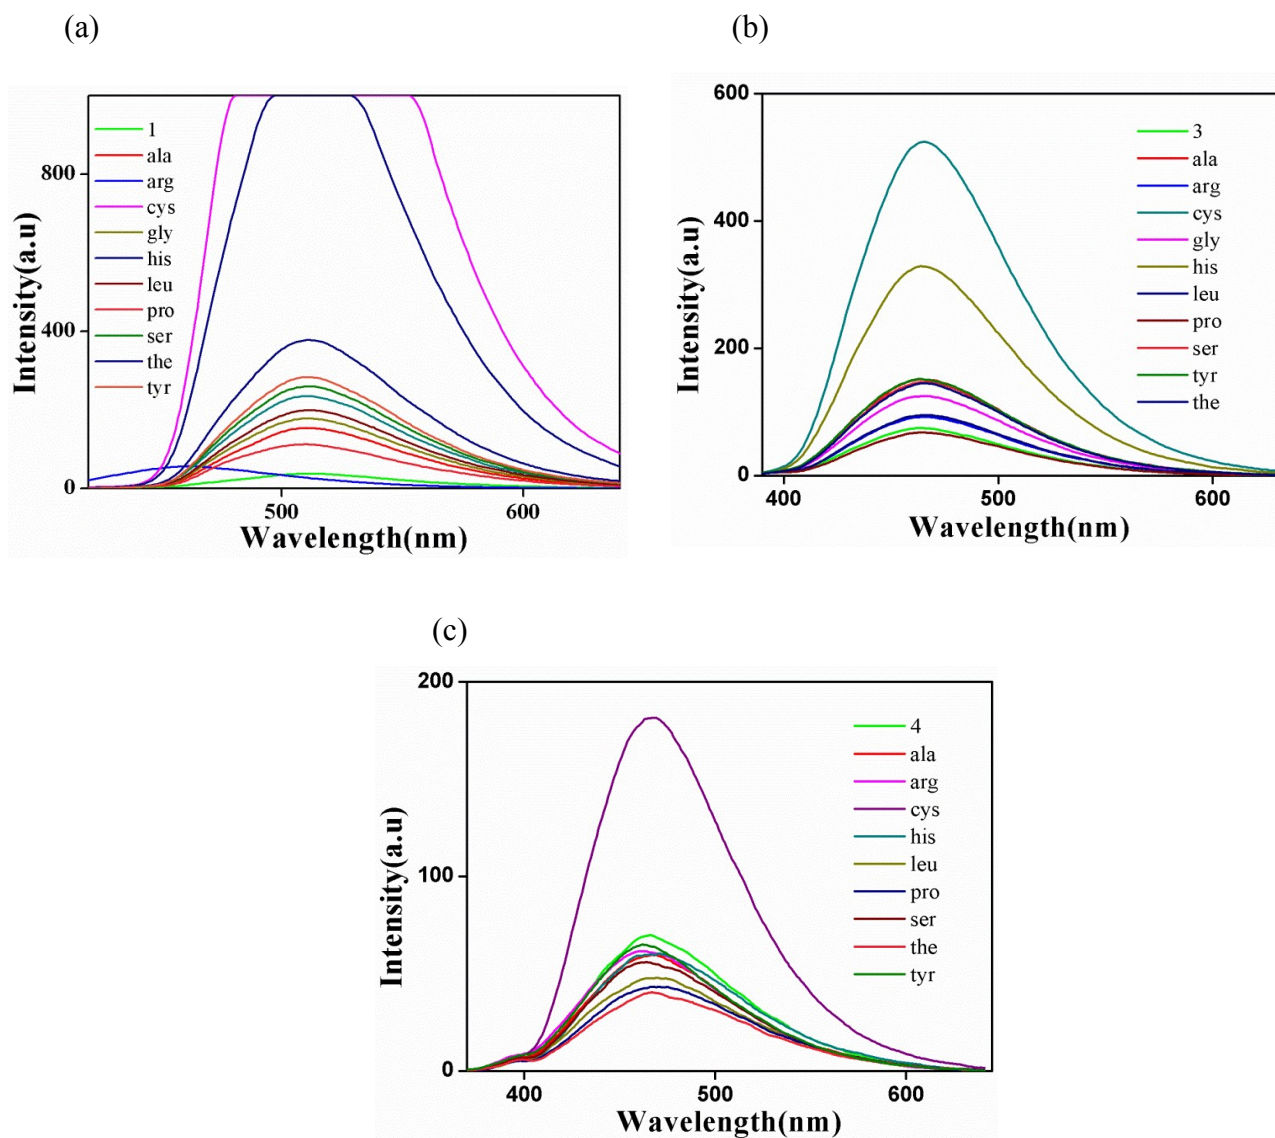

**Figure S26.** Fluorescence spectra of complexes 1 (a), 3 (b) and 4 (c) ( $5 \times 10^{-6}$  M) and after adding various amino acids ( $5 \times 10^{-5}$  M) in HEPES buffer pH, 7.34 at  $25^\circ$ .

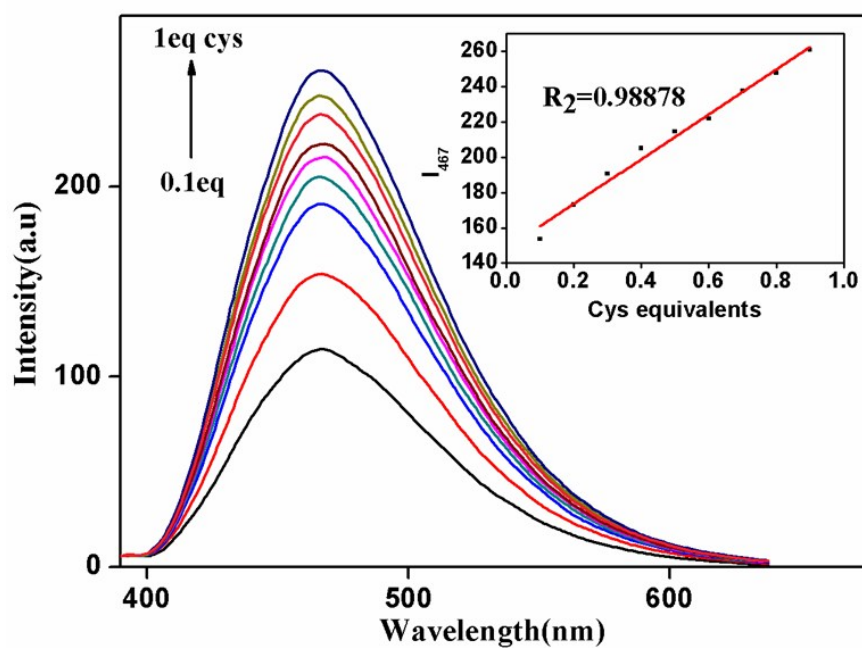

**Figure S27.** Changes in fluorescence intensity of **2** by addition of various concentrations of Cys ( $5 \times 10^{-7}$  M to  $5 \times 10^{-6}$  M) in HEPES buffer pH, 7.34 at 25°C, [ $\lambda_{\text{ex}} = 367$  nm, slits: 5nm/5nm]. Inset: Plot of fluorescence intensity vs [Cys].

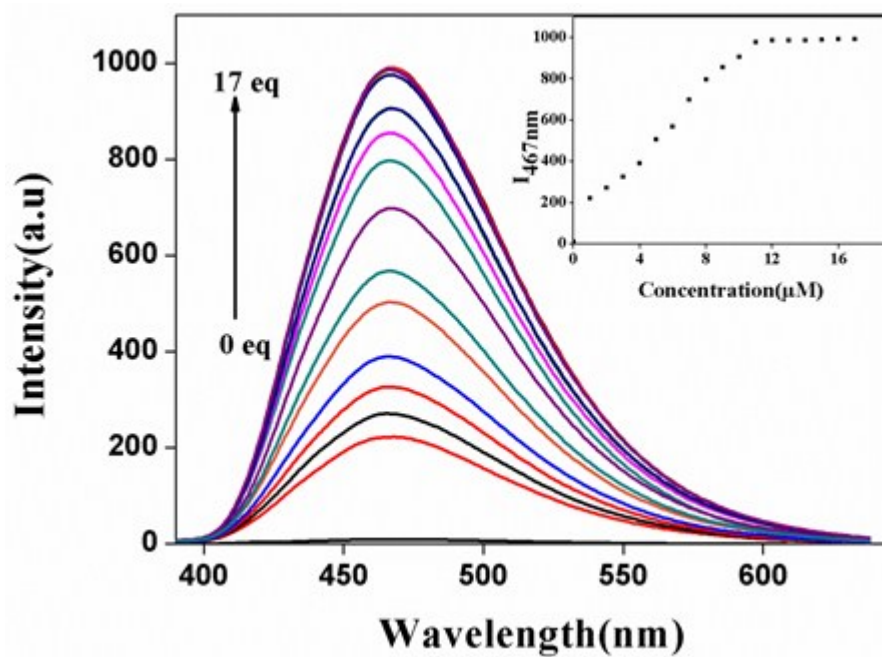

**Figure S28.** Fluorescence intensity changes of **2** on adding Cys in HEPES buffer, pH 7.34; [ $\lambda_{\text{exc}} = 367$  nm, slits: 5nm/5nm, time interval = 5 min].



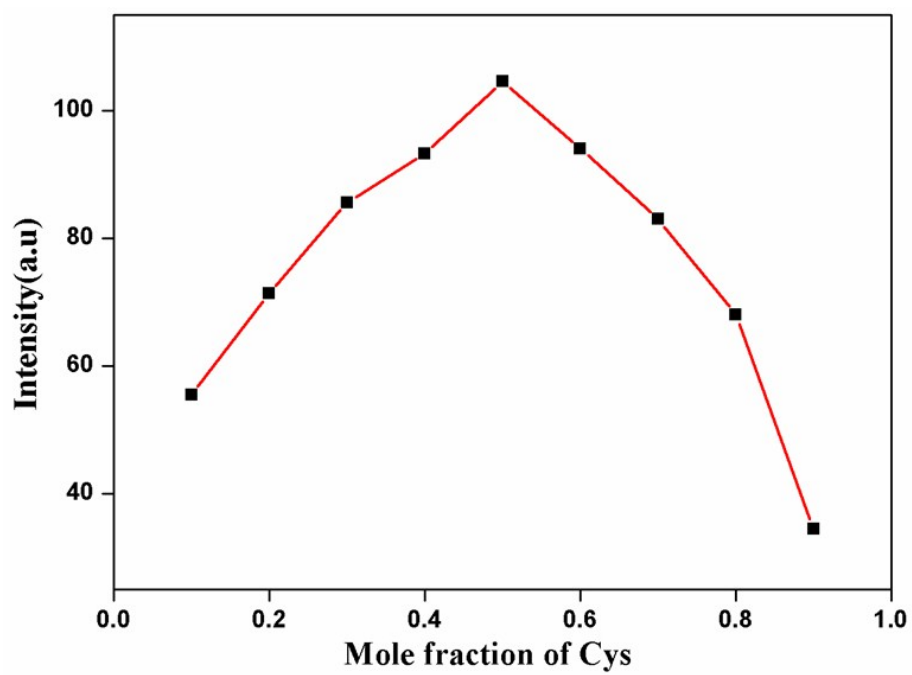

**Figure S29.** Job's plot, Fluorescence intensity at 467 nm was plotted as a function of the molar ratio of **2** and Cys.

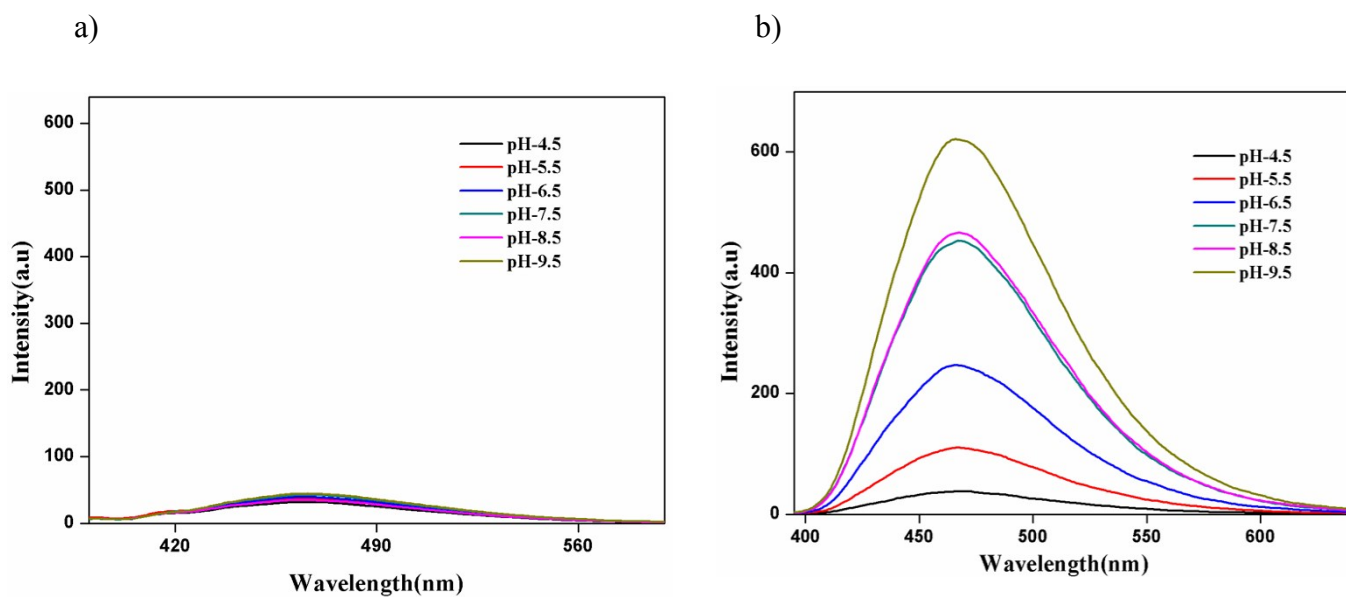

**Figure S30.** Emission spectral changes for **2** (a) and **2** + Cys (b) in various pH ( $5 \times 10^{-6}$ M) at 25 °C.

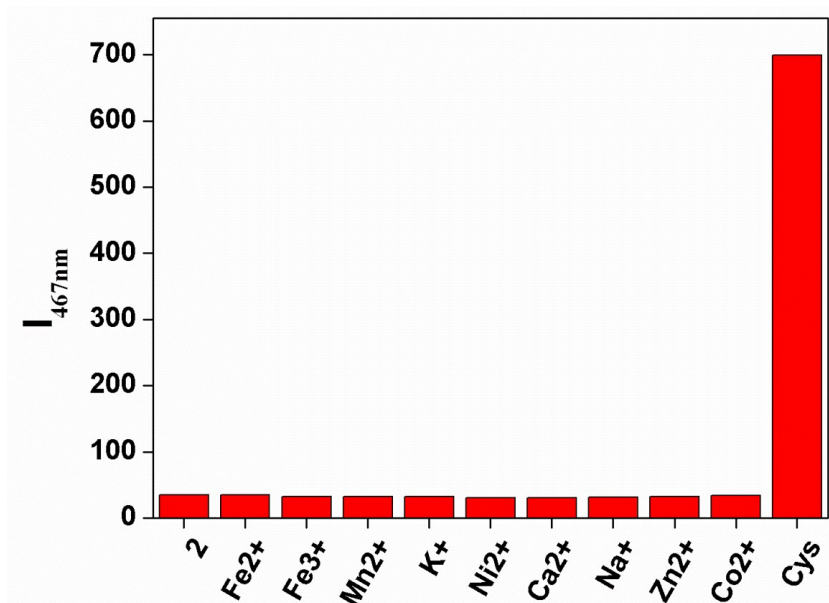

**Figure S31.** Bar diagram for fluorescence intensity of **2** with biologically relevant cations in HEPES buffer pH 7.34 ( $\lambda_{\text{ex}} = 467\text{nm}$ ) at 25 °C.

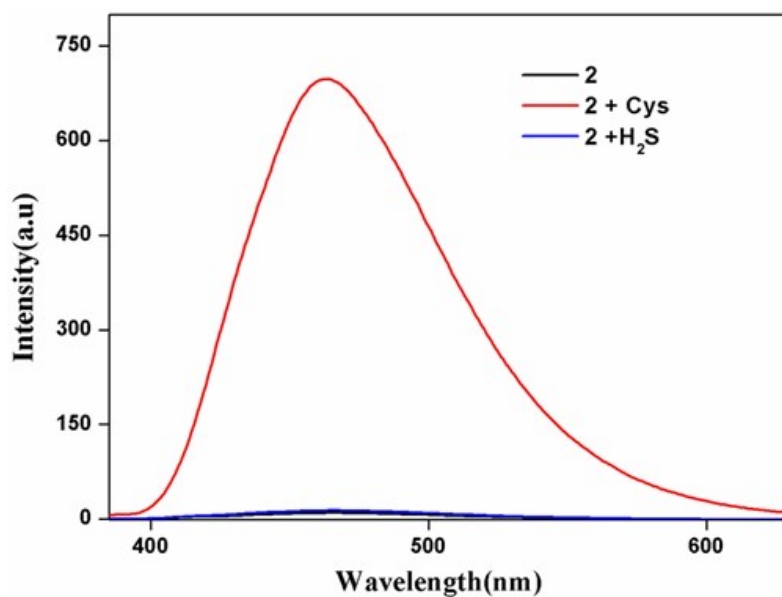

**Figure S32.** (a) Fluorescence spectra of **2**, **2+Cys** and **2+ H<sub>2</sub>S** ( $5 \times 10^{-6}$  M) in HEPES buffer pH, 7.34 at 25 °C.

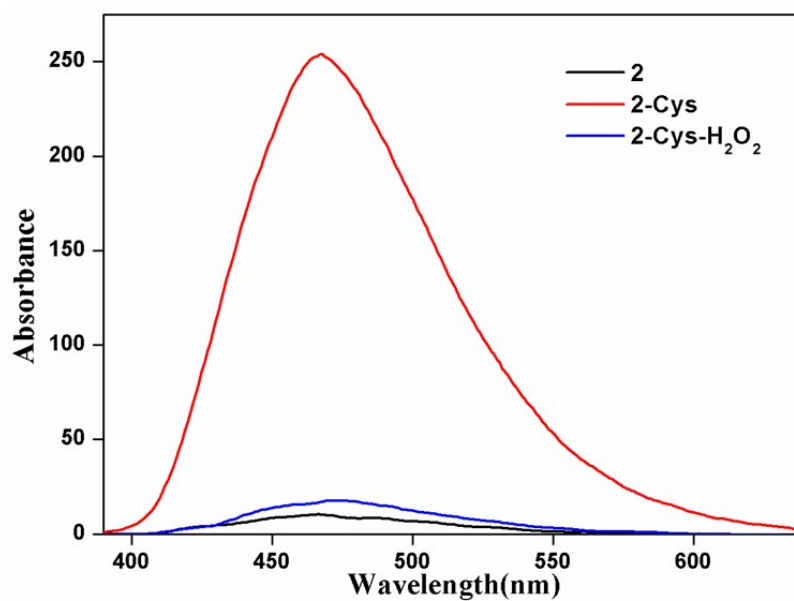

**Figure S33.** (a) Fluorescence spectra of **2** ( $5 \times 10^{-6}$  M) with H<sub>2</sub>O<sub>2</sub> in HEPES buffer pH, 7.34 at 25 °C.

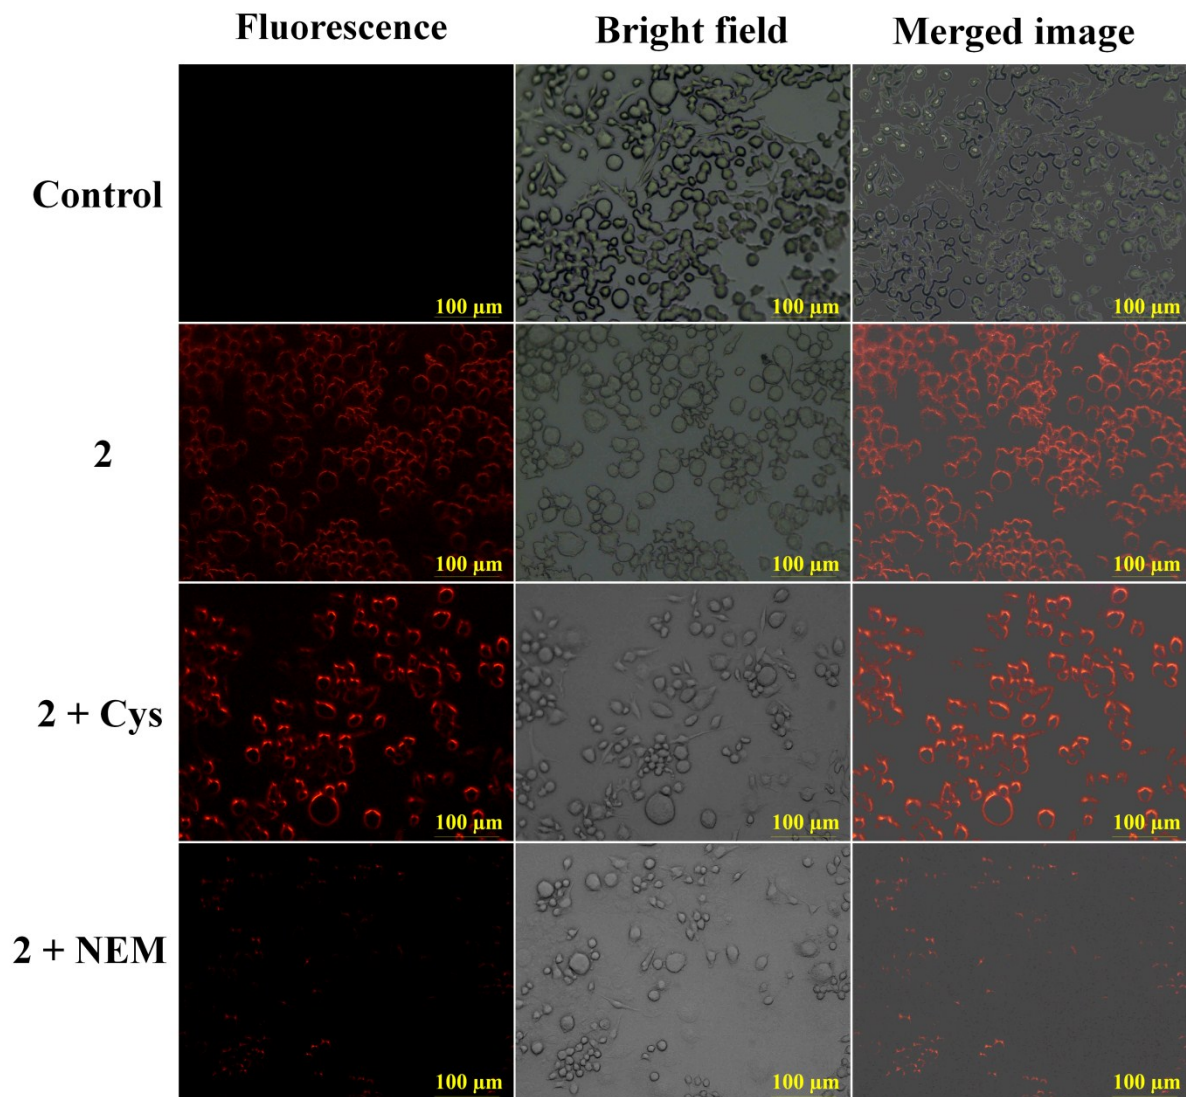

**Figure S34.** Fluorescence and bright-field images of Macrophage cells: (a) cells in the absence of **2**, (b) cells incubated with **2** (5  $\mu\text{M}$ ) for 30 minutes, (c) cells pre-treated with 100  $\mu\text{M}$  Cys and incubated with **2** (5  $\mu\text{M}$ ) for 30 minutes, and (d) cells pre-treated with 200  $\mu\text{M}$  NEM and incubated with **2** (5  $\mu\text{M}$ ) for 30 minutes

**Table S1.** Fluorescence quantum yield of L2 ( $2 \times 10^{-6}\text{M}$ ) and 2 + 20eq Cys ( $2 \times 10^{-6}\text{M}$ )  
 Fluorescence reference material: Quinine sulfate ( $2 \times 10^{-6}\text{M}$ )

$$Y_u = Y_s \times (F_u/F_s) \times (A_s/A_u)$$

|                 | $\lambda_{\text{exe}}$<br>(slits;5/5nm) | F<br>(Integral<br>fluorescence<br>intensity) | A<br>(Absorbance<br>at 366nm) | Integration<br>Range | Y<br>(Fluorescence<br>Quantum<br>yield) |
|-----------------|-----------------------------------------|----------------------------------------------|-------------------------------|----------------------|-----------------------------------------|
| Quinine sulfate | 362                                     | 76655.47673                                  | 0.021168                      | 381- 641             | -                                       |
| L1              | 362                                     | 3076.67930                                   | 0.011683                      | 386-641              | 4%                                      |
| 1 + Cys         | 362                                     | 5820.24758                                   | 0.059496                      | 386-641              | 1.6%                                    |
| Quinine sulfate | 367                                     | 60288.75532                                  | 0.017108                      | 386-641              | -                                       |
| L2              | 367                                     | 20021.7859                                   | 0.083895                      | 381-641              | 3.8%                                    |
| 2 + Cys         | 367                                     | 32804.3097                                   | 0.035156                      | 381-641              | 14%                                     |
| Quinine sulfate | 367                                     | 60288.75532                                  | 0.017108                      | 386-641              | -                                       |
| L3              | 367                                     | 23155.4069                                   | 0.048026                      | 386-641              | 7.6%                                    |
| 3 + Cys         | 367                                     | 5403.9150                                    | 0.077878                      | 386-641              | 1.8%                                    |
| Quinine sulfate | 318                                     | 80456.1335                                   | 0.024580                      | 337-641              | -                                       |
| L4              | 318                                     | 8182.14125                                   | 0.132585                      | 337-641              | 1.1%                                    |
| 4 + Cys         | 318                                     | 7518.9157                                    | 0.093554                      | 337-641              | 1.4%                                    |

**Table S2.** Computational data

| Computational details <sup>[a]</sup><br>[eV] | L                     | 2                                                 | 2+ Cys                                            |
|----------------------------------------------|-----------------------|---------------------------------------------------|---------------------------------------------------|
| Optimized energy                             | $-2.6456 \times 10^4$ | $-7.3850 \times 10^4$                             | $-6.7320 \times 10^4$                             |
| HOMO                                         | -4.986                | -7.829 ( $\alpha$ spin)<br>-7.835 ( $\beta$ spin) | -7.401( $\alpha$ spin)<br>-7.252 ( $\beta$ spin)  |
| LUMO                                         | -1.194                | -4.823( $\alpha$ spin)<br>-6.035 ( $\beta$ spin)  | -4.346 ( $\alpha$ spin)<br>-5.068 ( $\beta$ spin) |
| Energy gap                                   | 3.792                 | 3.006 ( $\alpha$ spin)<br>1.800 ( $\beta$ spin)   | 3.0555 ( $\alpha$ spin)<br>2.184 ( $\beta$ spin)  |
| TD-DFT                                       |                       |                                                   |                                                   |
| Optimized energy                             | $-2.6453 \times 10^4$ | $-7.3849 \times 10^4$                             | $-6.7320 \times 10^4$                             |
| HOMO                                         | -4.985                | -7.870 ( $\alpha$ spin)<br>-7.869 ( $\beta$ spin) | -7.401( $\alpha$ spin)<br>-7.252 ( $\beta$ spin)  |
| LUMO                                         | -1.194                | -4.745 ( $\alpha$ spin)<br>-5.939 ( $\beta$ spin) | -4.346 ( $\alpha$ spin)<br>-5.064 ( $\beta$ spin) |
| Energy gap                                   | 3.792                 | 3.125( $\alpha$ spin)<br>1.930 ( $\beta$ spin)    | 3.056 ( $\alpha$ spin)<br>2.184 ( $\beta$ spin)   |

<sup>[a]</sup> DFT method with B3LYP 6-31G (for C, H and N) and LANL2DZ (for Cu) basis sets in the Gaussian 09 program.

## Reply for B-level Check CIF alerts for each compound

### Complex 1

PLAT910\_ALERT\_3\_B Missing # of FCF Reflection(s) Below Theta(Min) 19 Note

**Authors Response:** Some reflections had to be omitted in the refinement for technical reasons.

### Complex 2

PLAT230\_ALERT\_2\_B Hirshfeld Test Diff for S2 -- O1W\_a .. 12.5 s.u.

PLAT230\_ALERT\_2\_B Hirshfeld Test Diff for O1W -- O24\_a .. 20.0 s.u.

PLAT230\_ALERT\_2\_B Hirshfeld Test Diff for O24 -- O1W\_a .. 20.0 s.u.

**Authors Response:** These alerts were appeared due to RIGU restraints. They were applied to atoms in the disordered chains. Several of the atoms were still not ideally shaped, however, this does not indicate an incorrect atom-type assignment.

PLAT415\_ALERT\_2\_B Short Inter D-H..H-X H34 .. H77 .. 2.04 Ang

**Authors Response:** This alert is related to the hydrogen atoms of lattice water molecules. It is very difficult to locate hydrogen atoms accurately using X-ray data because these atoms have low scattering power. In addition, the severe disorder in the complex makes the situation even worse.

PLAT780\_ALERT\_1\_B Coordinates do not Form a Properly Connected Set Please Do !

**Author Response:** These alerts are related to the disorder of solvent molecules and anions also data collection done in room temperature. These alerts are acceptable in crystallographic point of view.

PLAT910\_ALERT\_3\_B Missing # of FCF Reflection(s) Below Theta(Min) 14 Note

**Authors Response:** Some reflections had to be omitted in the refinement for technical reasons.

### Complex 3

THETM01\_ALERT\_3\_B The value of sine(theta\_max)/wavelength is less than 0.575

Calculated  $\sin(\theta_{\max})/\text{wavelength} = 0.5555$

**Author Response:** A full set of data was collected, however, the very high angle data was dominated by noise [ $I/\sigma(I) < 1.0$ ] and was omitted. This arbitrary theta limit is inappropriate for highly disordered structures. It would rule out all macromolecular

structures. A limit on data / parameter ratio's that properly takes into account the number of restraints / constraints and the redundancy of the measurements would be more appropriate. Unfortunately the cifcheck routine does not do this.

PLAT231\_ALERT\_4\_B Hirshfeld Test (Solvent) F4 --C42 . 13.7 s.u.

**Author Response:** These alerts are related to the disorder of solvent molecules and anions also data collection done in room temperature. These alerts are acceptable in crystallographic point of view.

PLAT234\_ALERT\_4\_B Large Hirshfeld Difference S2 --C42 0.30 Ang.

**Authors Response:** This is due to RIGU restraints were applied to atoms in the disordered chains. Several of the atoms were still not ideally shaped, however, this does not indicate an incorrect atom-type assignment.

PLAT601\_ALERT\_2\_B Structure Contains Solvent Accessible VOIDS of . 137 Ang\*\*3

**Authors Response:** The minor part of the disordered guest molecule was not assigned, which resulted in the voids.

PLAT910\_ALERT\_3\_B Missing # of FCF Reflection(s) Below Theta(Min). 20 Note.

**Authors Response:** Some reflections had to be omitted in the refinement for technical reasons.

#### **Complex 4**

PLAT214\_ALERT\_2\_B Atom C42 (Anion/Solvent) ADP max/min Ratio 5.7 prolat

**Authors Response:** This alert generated because there is a large amount of disorder in the structure

PLAT231\_ALERT\_4\_B Hirshfeld Test (Solvent) S2 -- C42 .. 12.3 s.u.

**Author Response:** These alerts are related to the disorder of solvent molecules and anions also data collection done in room temperature. These alerts are acceptable in crystallographic point of view.

PLAT231\_ALERT\_4\_B Hirshfeld Test (Solvent) F5 -- C42 .. 20.0 s.u.

**Author Response:** These alerts are related to the disorder of solvent molecules and anions also data collection done in room temperature. These alerts are acceptable in crystallographic point of view.



PLAT234\_ALERT\_4\_B Large Hirshfeld Difference F4 -- C42 .. 0.28 Ang.

**Authors Response:** RIGU restraints were applied to atoms in the disordered chains. Several of the atoms were still not ideally shaped, however, this does not indicate an incorrect atom-type assignment.

PLAT910\_ALERT\_3\_B Missing # of FCF Reflection(s) Below Theta(Min) 20 Note

**Authors Response:** Some reflections had to be omitted in the refinement for technical reasons.
